# Supplementary material for: Preparation, characterization and catalytic application of nano-Fe3O4-DOPA-SnO2 having high TON and TOF for non-toxic and sustainable synthesis of dihydroquinazolinone derivatives
Source: Royal Society of Chemistry journal article supplement (doi:10.1039/c7nj01208j), 2017-01-01

**Preparation, characterization and catalytic application of nano-Fe<sub>3</sub>O<sub>4</sub>-DOPA-SnO<sub>2</sub> having high TON and TOF for non-toxic and sustainable synthesis of dihydroquinazolinone derivatives**

**Binoyargha Dam <sup>a</sup>, Ranjit A. Patil <sup>b</sup>, Yuan-Ron Ma <sup>b</sup> and Amarta Kumar Pal <sup>a\*</sup>**

<sup>a</sup>*Department of Chemistry, Centre for Advanced Studies, North-Eastern Hill University, Shillong-793022, India, E-mail: [amartya\\_pal22@yahoo.com](mailto:amartya_pal22@yahoo.com), [akpal@nehu.ac.in](mailto:akpal@nehu.ac.in)*

<sup>b</sup>*Department Physics, National Dong Hwa University, Hualien-97401, Taiwan*

| <b>Table of content</b>                                        | <b>Page No.</b> |
|----------------------------------------------------------------|-----------------|
| 1. General Remarks                                             | 2               |
| 2. Characterization data of Fe <sub>3</sub> O <sub>4</sub> NPS | 2               |
| 3. Table S.I. 1,2,3 . X-ray crystallography data for compounds | 3-6             |
| 4. Spectral data of the compound                               | 7-17            |
| 5. <sup>1</sup> H & <sup>13</sup> C NMR Spectra of compounds   | 18-38           |

## General Remarks:

Melting points were determined in open capillaries and are uncorrected. IR spectra were recorded on Spectrum BX FT-IR, Perkin Elmer ( $\nu_{\max}$  in  $\text{cm}^{-1}$ ) on KBr disks.  $^1\text{H}$  NMR and  $^{13}\text{C}$  NMR (400 MHz and 100 MHz respectively) spectra were recorded on Bruker Avance II-400 spectrometer in  $\text{CDCl}_3$  and  $\text{CDCl}_3 + \text{DMSO-d}_6$  (chemical shifts in  $\delta$  with TMS as internal standard). Mass spectra were recorded using Waters ZQ-4000. Transmission Electron Microscope (TEM) images were recorded on JEOL JSM 100CX. Scanning electron microscope (SEM) and Energy Dispersive X-ray (EDX) images were obtained by using JSM-6360 (JEOL). ICP-AES analysis was performed by using ARCOS, Simultaneous ICP Spectrometer, Powder XRD was recorded on Bruker D8 XRD instrument SWAX. Thermogravimetric analysis (TGA) was recorded on a Perkin Elmer Precisely STA 6000 simultaneous thermal analyzer. CHN were recorded on CHN-OS analyzer (Perkin Elmer 2400, Series II). Silica gel G (E-merck, India) was used for TLC.

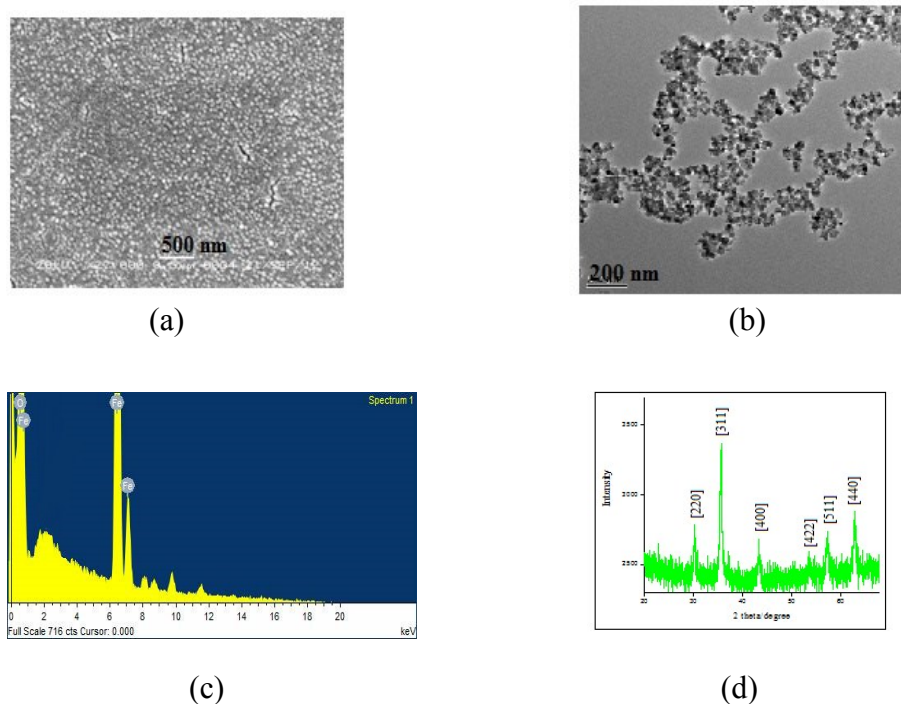

**Fig SI 1:** (a) SEM, (b) TEM, (c) EDX and (d) powder XRD of  $\text{Fe}_3\text{O}_4$  NPS

## X-ray crystallography

X-ray diffraction data were collected at 293 K with Mo K $\alpha$  radiation ( $\lambda = 0.71073 \text{ \AA}$ ) using Agilent Xcalibur (Eos, Gemini) diffractometer equipped with a graphite monochromator. Software used for data collection are CrysAlis PRO (Agilent, 2011), data reduction CrysAlis PRO and cell refinement CrysAlis PRO. Structures were solved by direct methods and refined by full-matrix least-squares calculation using SHELXS-97 and SHELXL-97.

**Table S.I.1.** X-ray crystallography data for compound **6f** (CCDC 1063941).

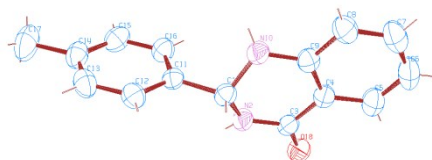

|                           |                                                  |
|---------------------------|--------------------------------------------------|
| Empirical formula         | C <sub>15</sub> H <sub>14</sub> N <sub>2</sub> O |
| Formula weight            | 238.29                                           |
| Crystal system            | Monoclinic                                       |
| Space group               | <i>P2<sub>1</sub>/C</i>                          |
| <i>a</i> ( $\text{\AA}$ ) | 13.027(2)                                        |
| <i>b</i> ( $\text{\AA}$ ) | 8.8840(12)                                       |
| <i>c</i> ( $\text{\AA}$ ) | 11.4246(17)                                      |
| $\alpha$ ( $^\circ$ )     | 90                                               |
| $\beta$ ( $^\circ$ )      | 109.209(18)                                      |
| $\gamma$ ( $^\circ$ )     | 90                                               |
| Volume ( $\text{\AA}^3$ ) | 1248.5(4)                                        |
| T(K)                      | 289.84(17)                                       |

|                                                 |                                      |
|-------------------------------------------------|--------------------------------------|
| Absorption coefficient ( $\mu/\text{mm}^{-1}$ ) | 0.081                                |
| Total reflection collected                      | 5990                                 |
| Independent reflection                          | 2884[R(int) = 0.0211]                |
| $2\theta$ range ( $^\circ$ )                    | 6.16 to 57.54 $^\circ$               |
| Final R Indexes [ $1 \geq 2\sigma(I)$ ]         | $R_1 = 0.0524$ , $wR_2 = \text{N/A}$ |
| Final R indexes [all data]                      | $R_1 = 0.0758$ , $wR_2 = 0.1531$     |
| Goodness-of-fit on $F^2$                        | 1.062                                |

**Table S.I.2.** X-ray crystallography data for compound **6k** (CCDC 1524323).

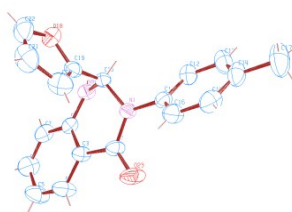

|                           |                                                  |
|---------------------------|--------------------------------------------------|
| Empirical formula         | $\text{C}_{19}\text{H}_{16}\text{N}_2\text{O}_2$ |
| Formula weight            | 304.35                                           |
| Crystal system            | Monoclinic                                       |
| Space group               | $P2_1/n$                                         |
| $a$ ( $\text{\AA}$ )      | 14.3966(17)                                      |
| $b$ ( $\text{\AA}$ )      | 6.8726(5)                                        |
| $c$ ( $\text{\AA}$ )      | 17.724(2)                                        |
| $\alpha$ ( $^\circ$ )     | 90                                               |
| $\beta$ ( $^\circ$ )      | 113.844(15)                                      |
| $\gamma$ ( $^\circ$ )     | 90                                               |
| Volume ( $\text{\AA}^3$ ) | 1603.9(4)                                        |

|                                                 |                                      |
|-------------------------------------------------|--------------------------------------|
| T(K)                                            | 293.25(10)                           |
| Absorption coefficient ( $\mu/\text{mm}^{-1}$ ) | 0.083                                |
| Total reflection collected                      | 15027                                |
| Independent reflection                          | 3799[R(int) = 0.0427]                |
| $2\theta$ range ( $^\circ$ )                    | 6.18 to 57.28 $^\circ$               |
| Final R Indexes [ $1 \geq 2\sigma(I)$ ]         | $R_1 = 0.0719$ , $wR_2 = \text{N/A}$ |
| Final R indexes [all data]                      | $R_1 = 0.1018$ , $wR_2 = 0.1570$     |
| Goodness-of-fit on $F^2$                        | 1.074                                |

**Table S.I.3.** X-ray crystallography data for compound **6m** (CCDC 1535780)

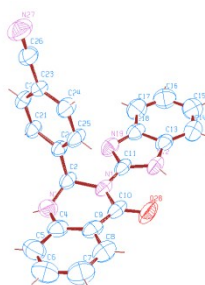

|                   |                                                |
|-------------------|------------------------------------------------|
| Empirical formula | $\text{C}_{22}\text{H}_{15}\text{N}_5\text{O}$ |
| Formula weight    | 365.40                                         |
| Crystal system    | Monoclinic                                     |
| Space group       | $C2/c$                                         |
| $a(\text{\AA})$   | 23.175(4)                                      |
| $b(\text{\AA})$   | 9.9645(11)                                     |
| $c(\text{\AA})$   | 16.245(2)                                      |
| $\alpha(^\circ)$  | 90                                             |
| $\beta(^\circ)$   | 107.625(18)                                    |
| $\gamma(^\circ)$  | 90                                             |

|                                              |                                                               |
|----------------------------------------------|---------------------------------------------------------------|
| Volume (Å <sup>3</sup> )                     | 3575.2(10)                                                    |
| T(K)                                         | 294.1(3)                                                      |
| Absorption coefficient (μ/mm <sup>-1</sup> ) | 0.088                                                         |
| Total reflection collected                   | 7321                                                          |
| Independent reflection                       | 3646 [R <sub>int</sub> = 0.0275, R <sub>sigma</sub> = 0.0502] |
| 2θ range (°)                                 | 6.48 to 52.74°                                                |
| Final R Indexes [I ≥ 2σ(I)]                  | R <sub>1</sub> = 0.0552, wR <sub>2</sub> = 0.1072             |
| Final R indexes [all data]                   | R <sub>1</sub> = 0.0958, wR <sub>2</sub> = 0.1284             |
| Goodness-of-fit on F <sup>2</sup>            | 1.074                                                         |

## SPECTRAL DATA

### 1. Compound 6a

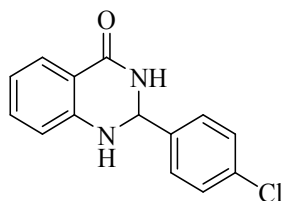

Light yellow solid. M.P.: 205-206 °C. IR (KBr): 3310, 3067, 1668, 1656, 752 cm<sup>-1</sup>. <sup>1</sup>H NMR (DMSO-d<sub>6</sub>, 400 MHz): δ = 7.71 (d, *J* = 8.0 Hz, 1H), 7.40 (d, *J* = 8.0 Hz, 2H), 7.27 (t, *J* = 8.0 Hz, 2H), 7.16 (t, *J* = 6.0 Hz, 1H), 6.71-6.65 (m, 2H), 6.60 (d, *J* = 8.0 Hz, 1H), 5.71 (s, 1H), 5.56 (brs, 1H). <sup>13</sup>C NMR (CDCl<sub>3</sub>, 100 MHz): δ = 159.5, 142.1, 132.7, 130.0, 129.3, 128.6, 123.7, 123.5, 123.0, 122.1, 120.9, 113.8, 109.4, 62.7. ESI- MS: *m/z* 259, 261 [M + H]<sup>+</sup>. Anal. Calcd for C<sub>14</sub>H<sub>11</sub>ClN<sub>2</sub>O: C, 65.00; H, 4.29; N, 10.83. Found: C, 65.18; H, 4.35; N, 10.62.

### 2. Compound 6b

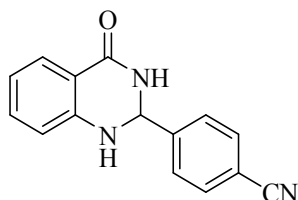

Light brown solid. M.P.: 250-252 °C. IR (KBr): 3354, 3337, 2228, 1667 cm<sup>-1</sup>. <sup>1</sup>H NMR (DMSO-d<sub>6</sub>, 400 MHz): δ = 8.18 (brs, 1H), 7.81 (d, *J* = 4.0 Hz, 1H), 7.71 (brs, 4H), 7.28 (t, *J* = 8.0 Hz, 1H), 6.91 (brs, 1H), 6.79 (d, *J* = 8.0 Hz, 1H), 6.75 (t, *J* = 8.0 Hz, 1H), 5.89 (s, 1H). <sup>13</sup>C NMR (CDCl<sub>3</sub> + DMSO-d<sub>6</sub>, 100 MHz): δ = 163.9, 146.8, 146.4, 133.3, 131.8, 127.4, 118.1, 117.5, 114.5, 114.3, 111.4, 65.81. ESI- MS: *m/z* 250 [M + H]<sup>+</sup>. Anal. Calcd for C<sub>15</sub>H<sub>11</sub>N<sub>3</sub>O: C, 72.28; H, 4.45; N, 16.86. Found: C, 72.36; H, 4.56; N, 16.62.

### 3. Compound 6c

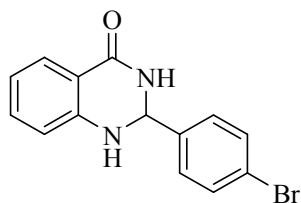

Light yellow solid. M.P.: 206-207 °C. IR (KBr): 3310, 1655 cm<sup>-1</sup>. <sup>1</sup>H NMR (CDCl<sub>3</sub>, 400 MHz): δ = 7.95 (d, *J* = 8.0 Hz, 1H), 7.60 (d, *J* = 8.0 Hz, 2H), 7.50 (d, *J* = 8.0 Hz, 2H), 7.37 (t, *J* = 6.0 Hz, 1H), 6.94 (t, *J* = 6.0 Hz, 1H), 6.69 (d, *J* = 8.0 Hz, 1H), 5.89 (s, 1H), 5.86 (brs, 1H), 4.38 (brs, 1H). <sup>13</sup>C NMR (CDCl<sub>3</sub>, 100 MHz): δ = 164.6, 146.9, 137.6, 134.2, 132.3, 129.1, 128.7, 119.9, 114.6, 68.5. ESI- MS: *m/z* 303, 305 [M+H]<sup>+</sup>. Anal. Calcd for C<sub>14</sub>H<sub>11</sub>BrN<sub>2</sub>O: C, 55.47; H, 3.66; N, 9.24. Found: C, 55.68; H, 3.95; N, 9.15.

### 4. Compound 6d

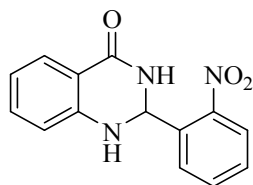

Light yellow solid. M.P.: 193-194 °C. IR (KBr): 3411, 1658, 1507, 1348 cm<sup>-1</sup>. <sup>1</sup>H NMR (CDCl<sub>3</sub>, 400 MHz): δ = 7.98 (d, *J* = 8.0 Hz, 1H), 7.86 (t, *J* = 8.0 Hz, 2H), 7.62 (t, *J* = 8.0 Hz, 1H), 7.48 (t, *J* = 8.0 Hz, 1H), 7.27 (t, *J* = 8.0 Hz, 1H), 6.81 (t, *J* = 8.0 Hz, 1H), 6.58 (d, *J* = 4.0 Hz, 1H), 6.51 (brs, 1H), 6.36 (s, 1H), 4.98 (brs, 1H). <sup>13</sup>C NMR (CDCl<sub>3</sub> + DMSO-d<sub>6</sub>, 100 MHz): δ = 163.4, 146.6, 145.4, 135.6, 133.16, 133.13, 128.6, 127.8, 127.0, 124.0, 117.5, 113.6, 113.3, 62.0. ESI- MS: *m/z* 270 [M + H]<sup>+</sup>. Anal. Calcd for C<sub>14</sub>H<sub>11</sub>N<sub>3</sub>O<sub>3</sub>: C, 62.45; H, 4.12; N, 15.61. Found: C, 62.41; H, 4.05; N, 15.62.



## 5. Compound 6e

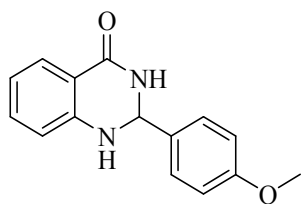

Light yellow solid. M.P.: 192-193 °C. IR (KBr): 3456, 3301, 1653, 1247 cm<sup>-1</sup>. <sup>1</sup>H NMR (CDCl<sub>3</sub>, 400 MHz): δ = 7.96 (d, *J* = 8.0 Hz, 1H), 7.54 (d, *J* = 8.0 Hz, 2H), 7.36 (t, *J* = 8.0 Hz, 1H), 6.97 (d, *J* = 8.0 Hz, 2H), 6.93 (t, *J* = 8.0 Hz, 1H), 6.68 (d, *J* = 8.0 Hz, 2H), 5.86 (s, 1H), 5.75 (brs, 1H), 4.36 (brs, 1H), 3.85 (s, 3H). <sup>13</sup>C NMR (CDCl<sub>3</sub>, 100 MHz): δ = 164.8, 160.9, 147.3, 134.0, 130.5, 128.8, 128.7, 119.6, 114.5, 114.3, 68.6, 55.4. ESI- MS: *m/z* 255 [M + H]<sup>+</sup>. Anal. Calcd for C<sub>15</sub>H<sub>14</sub>N<sub>2</sub>O<sub>2</sub>: C, 70.85; H, 5.55; N, 11.02. Found: C, 70.68; H, 5.59; N, 10.88.

## 6. Compound 6f

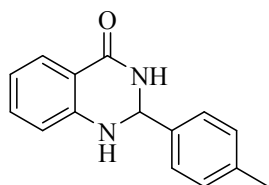

Light yellow solid. M.P.: 233-235 °C. IR (KBr): 3314, 2926, 1673, 1659 cm<sup>-1</sup>. <sup>1</sup>H NMR (CDCl<sub>3</sub>, 400 MHz): δ = 7.64 (d, *J* = 8.0 Hz, 1H), 7.30 (d, *J* = 4.0 Hz, 2H), 7.11-7.04 (m, 3H), 6.97 (brs, 1H), 6.60 (d, *J* = 8.0 Hz, 2H), 5.64 (s, 1H), 2.93 (brs, 1H), 2.20 (s, 3H). <sup>13</sup>C NMR (CDCl<sub>3</sub> + DMSO-d<sub>6</sub>, 100 MHz): δ = 169.5, 152.9, 143.6, 142.1, 138.3, 134.0, 132.6, 132.0, 122.7, 119.9, 119.5, 72.7, 25.9. ESI- MS: *m/z* 239 [M + H]<sup>+</sup>. Anal. Calcd for C<sub>15</sub>H<sub>14</sub>N<sub>2</sub>O: C, 75.61; H, 5.92; N, 11.76. Found: C, 75.78; H, 5.95; N, 11.67.

## 7. Compound 6g

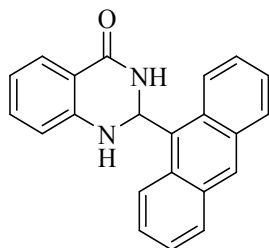

Yellow solid. M.P.: 237-239 °C. IR (KBr): 3366, 3203, 1678  $\text{cm}^{-1}$ .  $^1\text{H}$  NMR ( $\text{CDCl}_3$ , 400 MHz):  $\delta$  = 8.50 (s, 1H), 8.04-7.98 (m, 3H), 7.45 (s, 5H), 7.35 (t,  $J$  = 6.0Hz, 1H), 7.27 (d,  $J$  = 8.0 Hz, 1H), 7.10-7.01 (m, 1H), 6.95 (t,  $J$  = 8.0 Hz, 1H), 6.65-6.60 (m, 1H), 6.13 (s, 1H), 4.56 (s, 1H).  $^{13}\text{C}$  NMR ( $\text{CDCl}_3$ , 100 MHz):  $\delta$  = 165.9, 148.3, 134.2, 132.6, 131.7, 131.0, 130.5, 129.4, 129.1, 125.3, 125.2, 119.7, 117.2, 116.0, 114.7, 63.9. ESI- MS:  $m/z$  325  $[\text{M} + \text{H}]^+$ . Anal. Calcd for  $\text{C}_{22}\text{H}_{16}\text{N}_2\text{O}$ : C, 81.46; H, 4.97; N, 8.64. Found: C, 81.73; H, 5.05; N, 8.86.

## 8. Compound 6h

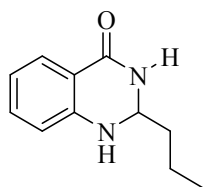

Red solid. M.P.: 173-175 °C. IR (KBr): 3214, 3021, 1670  $\text{cm}^{-1}$ .  $^1\text{H}$  NMR ( $\text{CDCl}_3$ , 400 MHz):  $\delta$  = 7.89 (d,  $J$  = 4.0 Hz, 1H), 7.31 (t,  $J$  = 4.0 Hz, 1H), 6.87 (t,  $J$  = 6.0 Hz, 1H), 6.67 (d,  $J$  = 4.0 Hz, 1H), 6.24 (brs, 1H), 4.90 (t,  $J$  = 4.0 Hz, 1H), 4.22 (brs, 1H), 1.78 (q, 2H), 1.52-1.46 (m, 2H), 1.01 (t,  $J$  = 4.0 Hz, 3H).  $^{13}\text{C}$  NMR ( $\text{CDCl}_3$ , 100 MHz):  $\delta$  = 165.7, 147.6, 134.1, 128.8, 119.6, 116.1, 114.9, 65.3, 37.8, 17.6, 14.0. ESI- MS:  $m/z$  191  $[\text{M} + \text{H}]^+$ . Anal. Calcd for  $\text{C}_{11}\text{H}_{14}\text{N}_2\text{O}$ : C, 69.45; H, 7.42; N, 14.73. Found: C, 69.39; H, 7.67; N, 14.59.

## 9. Compound 6i

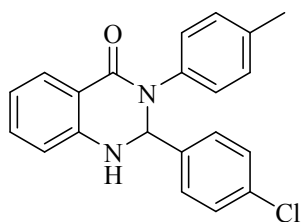

Light yellow solid. M.P.: 243-245 °C. IR (KBr): 3306, 3064, 1667  $\text{cm}^{-1}$ .  $^1\text{H}$  NMR ( $\text{CDCl}_3$ , 400 MHz):  $\delta$  = 8.03 (d,  $J$  = 12.0 Hz, 1H), 7.34-7.23 (m, 5H), 7.11 (d,  $J$  = 8.0 Hz, 2H), 7.06 (d,  $J$  = 8.0 Hz, 2H), 6.92 (t,  $J$  = 6.0 Hz, 1H), 6.65 (d,  $J$  = 8.0 Hz, 1H), 6.06 (s, 1H), 4.73 (brs, 1H), 2.29 (s, 3H).  $^{13}\text{C}$  NMR ( $\text{CDCl}_3$ , 100 MHz):  $\delta$  = 163.1, 145.0, 138.4, 137.6, 136.8, 134.7, 133.9, 129.7, 129.0, 128.9, 128.2, 126.7, 119.8, 116.8, 114.9, 74.0, 21.0. ESI- MS:  $m/z$  349, 351  $[\text{M} + \text{H}]^+$ . Anal. Calcd for  $\text{C}_{21}\text{H}_{17}\text{ClN}_2\text{O}$ : C, 72.31; H, 4.91; N, 8.03. Found: C, 72.58; H, 4.95; N, 7.92.

## 10. Compound 6j

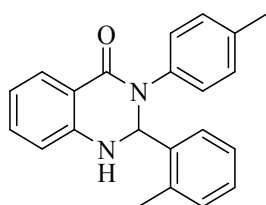

Light yellow solid. M.P.: 201-204 °C. IR (KBr): 3297, 2926, 1632  $\text{cm}^{-1}$ .  $^1\text{H}$  NMR ( $\text{CDCl}_3$ , 400 MHz):  $\delta$  = 7.98 (d,  $J$  = 8.0 Hz, 1H), 7.51 (d,  $J$  = 8.0 Hz, 1H), 7.24-7.23 (m, 1H), 7.12-7.04 (m, 2H), 7.01-6.96 (m, 4H), 6.83 (t,  $J$  = 6.0 Hz, 2H), 6.54 (d,  $J$  = 12.0 Hz, 1H), 6.31 (s, 1H), 4.50 (brs, 1H), 2.24 (s, 3H), 2.19 (s, 3H).  $^{13}\text{C}$  NMR ( $\text{CDCl}_3$ , 100 MHz):  $\delta$  = 158.5, 140.2, 132.3, 131.9, 131.4, 129.8, 128.5, 125.8, 124.2, 123.7, 123.5, 122.3, 121.6, 121.1, 114.1, 111.3, 109.5, 66.3, 15.8, 14.0. ESI- MS:  $m/z$  329  $[\text{M} + \text{H}]^+$ . Anal. Calcd for  $\text{C}_{22}\text{H}_{20}\text{N}_2\text{O}$ : C, 80.74; H, 6.14; N, 8.53. Found: C, 80.59; H, 5.98; N, 8.38.

## 11. Compound 6k

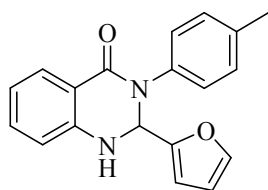

Light yellow solid. M.P.: 161-163 °C. IR (KBr): 3356, 3113, 1673  $\text{cm}^{-1}$ .  $^1\text{H}$  NMR ( $\text{CDCl}_3$ , 400 MHz):  $\delta$  = 7.95 (d,  $J$  = 8.0 Hz, 1H), 7.27 (t,  $J$  = 8.0 Hz, 2H), 7.20 (brs, 3H), 7.12 (d,  $J$  = 8.0 Hz, 2H), 6.86 (t,  $J$  = 8.0 Hz, 1H), 6.64 (d,  $J$  = 8.0 Hz, 1H), 6.25 (brs, 1H), 6.18 (brs, 1H), 5.96 (s, 1H), 2.28 (s, 3H).  $^{13}\text{C}$  NMR ( $\text{CDCl}_3$ , 100 MHz):  $\delta$  = 162.6, 152.2, 145.1, 142.7, 138.0, 136.7, 133.6, 129.6, 128.9, 126.1, 119.9, 117.3, 115.0, 110.4, 109.0, 68.6, 21.0. ESI-MS:  $m/z$  305  $[\text{M} + \text{H}]^+$ . Anal. Calcd for  $\text{C}_{19}\text{H}_{16}\text{N}_2\text{O}_2$ : C, 74.98; H, 5.30; N, 9.20. Found: C, 74.77; H, 5.55; N, 9.33.

## 12. Compound 6l

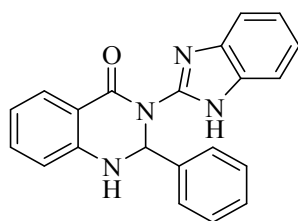

Off white. solid. M.P.: 102-105 °C. IR (KBr): 3336, 3109, 1694  $\text{cm}^{-1}$ .  $^1\text{H}$  NMR ( $\text{CDCl}_3$ , 400 MHz):  $\delta$  = 11.69 (brs, 1H), 8.00 (d,  $J$  = 8.0 Hz, 1H), 7.63 (d,  $J$  = 4.0 Hz, 2H), 7.46-7.37 (m, 4H), 7.27-7.22 (m, 5H), 6.95 (t,  $J$  = 8.0 Hz, 1H), 6.84 (d,  $J$  = 12.0 Hz, 1H), 5.35 (d,  $J$  = 4.0 Hz, 1H).  $^{13}\text{C}$  NMR ( $\text{CDCl}_3$ , 100 MHz):  $\delta$  = 163.3, 150.4, 145.5, 135.2, 134.1, 131.2, 129.1, 129.0, 128.6, 128.4, 126.0, 122.3, 120.0, 116.7, 116.3, 116.1, 110.7, 67.7. ESI-MS:  $m/z$  341  $[\text{M} + \text{H}]^+$ . Anal. Calcd for  $\text{C}_{21}\text{H}_{16}\text{N}_4\text{O}$ : C, 74.10; H, 4.74; N, 16.46. Found: C, 74.03; H, 4.79; N, 16.28.

### 13. Compound 6m

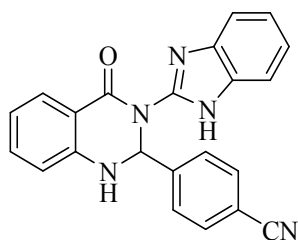

Light yellow solid. M.P.: 143-145 °C. IR (KBr): 3106, 2228, 1697  $\text{cm}^{-1}$ .  $^1\text{H}$  NMR ( $\text{CDCl}_3$ , 400 MHz):  $\delta$  = 11.6 (brs, 1H), 8.03 (d,  $J$  = 8.0 Hz, 1H), 7.69 (d,  $J$  = 4.0 Hz, 1H), 7.65-7.64(m, 1H), 7.55 (s, 4H), 7.50 (t,  $J$  = 8.0 Hz, 3H), 7.31 (s, 1H), 7.04 (t,  $J$  = 8.0 Hz, 1H), 6.94 (d,  $J$  = 8.0 Hz, 1H), 5.33 (d,  $J$  = 4.0 Hz, 1H).  $^{13}\text{C}$  NMR ( $\text{CDCl}_3$ , 100 MHz):  $\delta$  = 162.8, 147.8, 144.7, 144.5, 139.9, 135.5, 132.9, 132.4, 132.1, 129.9, 129.3, 127.0, 122.6, 120.9, 118.3, 118.0, 116.9, 116.7, 112.4, 110.9, 67.0. ESI- MS:  $m/z$  366  $[\text{M} + \text{H}]^+$ . Anal. Calcd for  $\text{C}_{22}\text{H}_{15}\text{N}_5\text{O}$ : C, 72.32; H, 4.14; N, 19.17. Found: C, 72.29; H, 4.11; N, 18.98.

### 14. Compound 6n

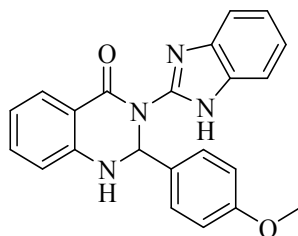

Brown solid. M.P.: 291-293 °C. IR (KBr): 3326, 3103, 1695  $\text{cm}^{-1}$ .  $^1\text{H}$  NMR ( $\text{CDCl}_3$ , 400 MHz):  $\delta$  = 11.67 (brs, 1H), 7.99 (d,  $J$  = 4.0 Hz, 1H), 7.63 (d,  $J$  = 4.0 Hz, 1H), 7.57 (d,  $J$  = 4.0 Hz, 1H), 7.44-7.38 (m, 2 H), 7.30 (d,  $J$  = 4.0 Hz, 2H), 7.24-7.21 (m, 2H), 6.93 (t,  $J$  = 6.0 Hz, 1H), 6.82 (d,  $J$  = 8.0 Hz, 1H), 6.74 (d,  $J$  = 8.0 Hz, 2H), 5.22 (s, 1H), 3.70 (s, 3H).  $^{13}\text{C}$  NMR ( $\text{CDCl}_3 + \text{DMSO-d}_6$ , 100 MHz):  $\delta$  = 163.3, 159.2, 146.6, 134.9, 131.8, 131.4, 128.7, 127.3, 121.9, 118.6, 115.7, 114.3, 114.2, 113.6, 113.1, 67.2, 55.0. ESI- MS:  $m/z$  371  $[\text{M} + \text{H}]^+$ . Anal. Calcd for  $\text{C}_{22}\text{H}_{18}\text{N}_4\text{O}_2$ : C, 71.34; H, 4.90; N, 15.13. Found: C, 71.14; H, 5.07; N, 15.04.

## 15. Compound 6o

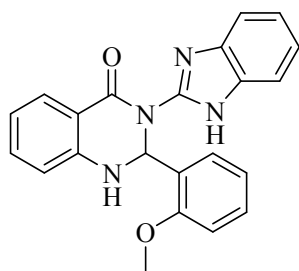

Brown solid. M.P.: 275-277 °C. IR (KBr): 3325, 3110, 1691  $\text{cm}^{-1}$ .  $^1\text{H}$  NMR ( $\text{CDCl}_3$ , 400 MHz):  $\delta$  = 11.79 (brs, 1H), 8.00 (d,  $J$  = 4.0 Hz, 1H), 7.67 (d,  $J$  = 1.6 Hz, 1H), 7.57-7.55 (m, 1H), 7.44-7.42 (m, 1H), 7.21-7.19 (m, 4H), 6.99 (d,  $J$  = 8.0 Hz, 1H), 6.93 (d,  $J$  = 8.0 Hz, 1H), 6.84 (t,  $J$  = 6.0 Hz, 1H), 6.75 (t,  $J$  = 6.0 Hz, 1H), 6.61 (d,  $J$  = 8.0 Hz, 1H), 5.70 (s, 1H), 4.01 (s, 3H). ESI- MS:  $m/z$  371  $[\text{M} + \text{H}]^+$ . Anal. Calcd for  $\text{C}_{22}\text{H}_{18}\text{N}_4\text{O}_2$ : C, 71.34; H, 4.90; N, 15.13. Found: C, 71.12; H, 5.07; N, 15.25.

## 16. Compound 6p

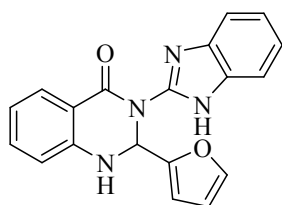

Light Brown solid. M.P.: 148-150 °C. IR (KBr): 3416, 3093, 1636, 1662  $\text{cm}^{-1}$ .  $^1\text{H}$  NMR ( $\text{CDCl}_3$ , 400 MHz):  $\delta$  = 11.59 (brs, 1H), 8.02 (d,  $J$  = 4.0 Hz, 1H), 7.65 (d,  $J$  = 8.0 Hz, 1H), 7.57 (d,  $J$  = 3.2 Hz, 1H), 7.47-7.39 (m, 3H), 7.25-7.23 (m, 2H), 6.97 (t,  $J$  = 6.0 Hz, 1H), 6.81 (d,  $J$  = 4.0 Hz, 1H), 6.17 (s, 2H), 5.19 (s, 1H).  $^{13}\text{C}$  NMR ( $\text{CDCl}_3$ , 100 MHz):  $\delta$  = 168.8, 142.5, 141.9, 134.5, 134.4, 133.0, 132.4, 131.6, 131.4, 130.6, 130.5, 130.1, 122.3, 122.1, 120.2, 111.8, 111.6, 110.3, 60.4. ESI- MS:  $m/z$  331  $[\text{M} + \text{H}]^+$ . Anal. Calcd for  $\text{C}_{19}\text{H}_{14}\text{N}_4\text{O}_2$ : C, 69.08; H, 4.27; N, 16.96. Found: C, 68.89; H, 4.08; N, 17.09.

## 17. Compound 6q

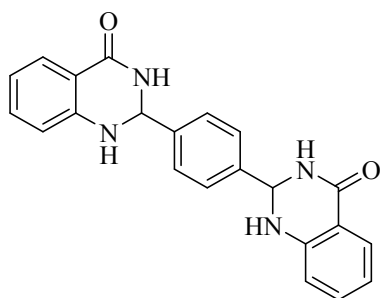

Light brown solid. M.P.: 244-246 °C. IR (KBr): 3416, 3212, 1663, 1669  $\text{cm}^{-1}$ .  $^1\text{H}$  NMR ( $\text{CDCl}_3$ , 400 MHz):  $\delta$  = 10.04 (s, 1H), 7.94 (d,  $J$  = 8.0 Hz, 2H), 7.87 (d,  $J$  = 8.0 Hz, 2H), 7.78 (d,  $J$  = 8.0 Hz, 2H), 7.62 (s, 1H), 7.43 (s, 2H), 7.32 (t,  $J$  = 6.0 Hz, 2H), 6.91 (brs, 1H), 6.85 (t,  $J$  = 8.0 Hz, 2H), 6.77 (d,  $J$  = 8.0 Hz, 1H), 5.96 (s, 1H), 5.89 (s, 1H).  $^{13}\text{C}$  NMR ( $\text{CDCl}_3$  +  $\text{DMSO-d}_6$ , 100 MHz):  $\delta$  = 164.0, 147.4, 141.6, 133.0, 129.3, 127.2, 126.6, 117.1, 114.7, 114.2, 66.3. ESI- MS:  $m/z$  371  $[\text{M} + \text{H}]^+$ . Anal. Calcd for  $\text{C}_{22}\text{H}_{18}\text{N}_4\text{O}_2$ : C, 71.34; H, 4.90; N, 15.13. Found: C, 71.18; H, 5.09; N, 15.07.

## 18. Compound 6r

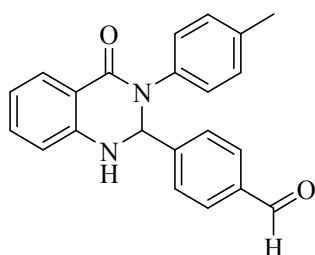

Light brown solid. M.P.: 198-201 °C. IR (KBr): 3412, 3211, 1689  $\text{cm}^{-1}$ .  $^1\text{H}$  NMR ( $\text{CDCl}_3$ , 400 MHz):  $\delta$  = 9.96 (s, 1H), 8.04 (d,  $J$  = 8.0 Hz, 1H), 7.81 (d,  $J$  = 8.0 Hz, 2H), 7.55 (d,  $J$  = 4.0 Hz, 2H), 7.35 (t,  $J$  = 8.0 Hz, 1H), 7.23 (brs, 1H), 7.12-7.06 (m, 4H), 6.94 (t,  $J$  = 8.0 Hz, 1H), 6.67 (d,  $J$  = 8.0 Hz, 1H), 6.16 (s, 1H), 2.30 (s, 3H).  $^{13}\text{C}$  NMR ( $\text{CDCl}_3$  +  $\text{DMSO-d}_6$ , 100 MHz):  $\delta$  = 196.5, 167.6, 152.0, 150.8, 142.9, 141.0, 140.9, 138.6, 134.6, 134.3, 134.1, 133.2,

132.1, 130.9, 123.1, 120.6, 119.7, 78.2, 25.7. ESI- MS:  $m/z$  343  $[M + H]^+$ . Anal. Calcd for  $C_{22}H_{18}N_2O_2$ : C, 77.17; H, 5.30; N, 8.18. Found: C, 77.28; H, 5.09; N, 8.20.

### 19. Compound 6s

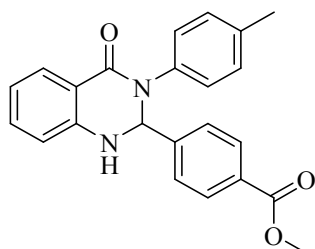

Brown solid. M.P.: 210-213 °C. IR (KBr): 3329, 3000, 1720, 1639  $cm^{-1}$ .  $^1H$  NMR ( $CDCl_3$ , 400 MHz):  $\delta$  = 8.03 (d,  $J$  = 8.0 Hz, 1H), 7.95 (d,  $J$  = 8.0 Hz, 2H), 7.45 (d,  $J$  = 8.0 Hz, 2H), 7.33 (t,  $J$  = 8.0 Hz, 1H), 7.27 (brs, 1H), 7.11-7.05 (m, 4 H), 6.93 (t,  $J$  = 8.0 Hz, 1H), 6.65 (d,  $J$  = 8.0 Hz, 1H), 6.13 (s, 1H), 3.89 (s, 3H), 2.29 (s, 3H).  $^{13}C$  NMR ( $CDCl_3$ , 100 MHz):  $\delta$  = 166.5, 163.0, 144.9, 144.7, 137.6, 136.9, 133.9, 130.6, 130.0, 129.7, 129.0, 126.8, 126.6, 119.8, 116.8, 114.9, 74.2, 52.2, 21.0. ESI- MS:  $m/z$  373  $[M + H]^+$ . Anal. Calcd for  $C_{23}H_{20}N_2O_3$ : C, 74.18; H, 5.41; N, 7.52. Found: C, 74.24; H, 5.39; N, 7.67.

### 20. Compound 7a

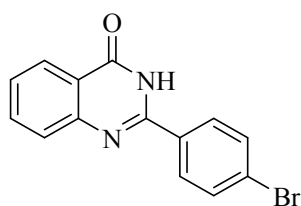

Off white solid. M.P.: 319-321 °C. IR (KBr): 3309, 1639, 1671  $cm^{-1}$ .  $^1H$  NMR ( $CDCl_3$ , 400 MHz):  $\delta$  = 7.87 (d,  $J$  = 4.0 Hz, 1H), 7.53 (d,  $J$  = 8.0 Hz, 2H), 7.43 (d,  $J$  = 12.0 Hz, 2H), 7.30 (t,  $J$  = 8.0 Hz, 1H), 6.87 (t,  $J$  = 8.0 Hz, 1H), 6.62 (d,  $J$  = 8.0 Hz, 1H), 4.31 (brs, 1H).  $^{13}C$  NMR ( $CDCl_3$ , 100 MHz):  $\delta$  = 160.3, 148.0, 147.8, 147.7, 147.3, 136.4, 133.5, 127.0, 126.2,



125.7, 125.2, 120.9. ESI- MS:  $m/z$  301, 303  $[M + H]^+$ . Anal. Calcd for  $C_{14}H_9BrN_2O$ : C, 55.84; H, 3.01; N, 9.30. Found: C, 56.01; H, 3.09; N, 9.07.s

## 21. Compound 7b

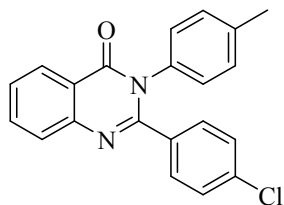

White solid. M.P.: 183-185 °C. IR (KBr): 2918, 1646, 1665  $cm^{-1}$ .  $^1H$  NMR ( $CDCl_3$ , 400 MHz):  $\delta$  = 8.28 (d,  $J$  = 8.0 Hz, 1H), 8.20 (d,  $J$  = 8.0 Hz, 2H), 7.78 (d,  $J$  = 4.0 Hz, 2H), 7.51-7.48 (m, 7H), 2.60 (3H).  $^{13}C$  NMR ( $DMSO-d_6$ , 100 MHz):  $\delta$  = 164.5, 147.9, 138.6, 137.1, 133.2, 128.9, 127.5, 126.9, 117.7, 114.8, 114.4, 20.9. ESI- MS:  $m/z$  347, 349  $[M + H]^+$ . Anal. Calcd for  $C_{21}H_{15}ClN_2O$ : C, 72.73; H, 4.36; N, 8.08. Found: C, 72.59; H, 4.57; N, 8.01.

# $^1\text{H}$ and $^{13}\text{C}$ NMR spectra

1. **6a**

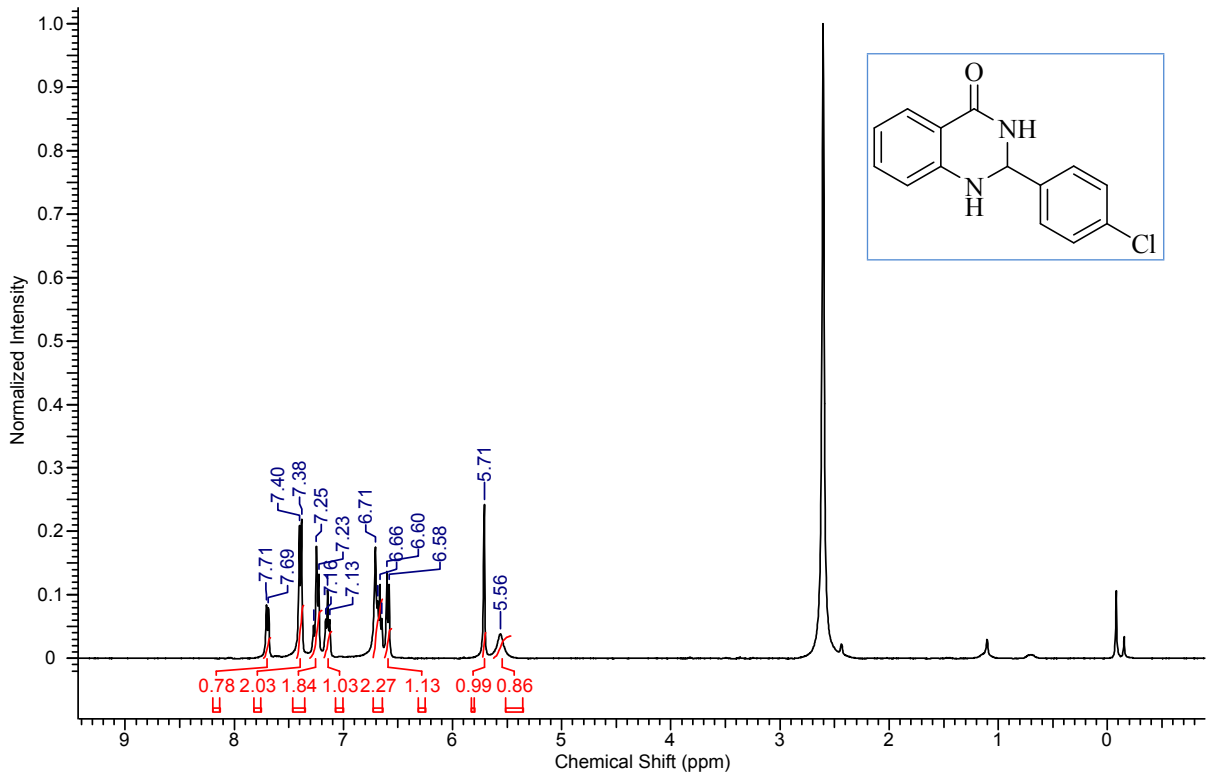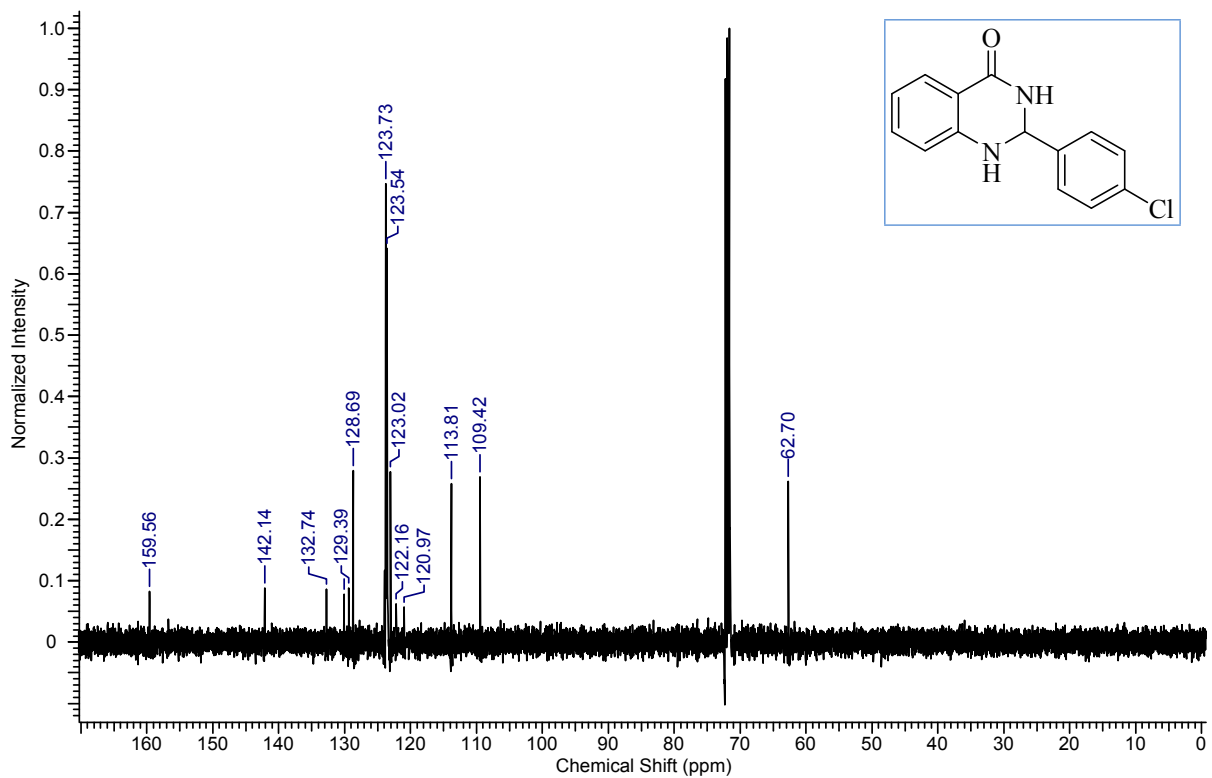

2. **6b**

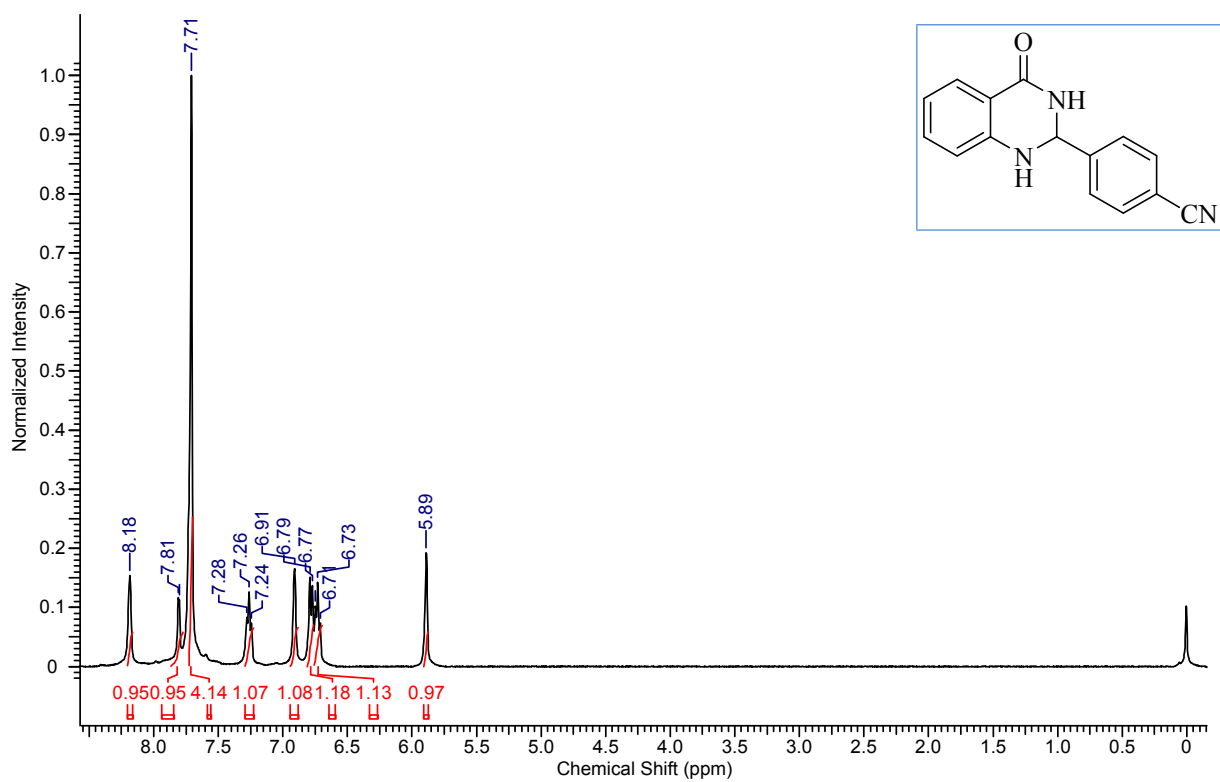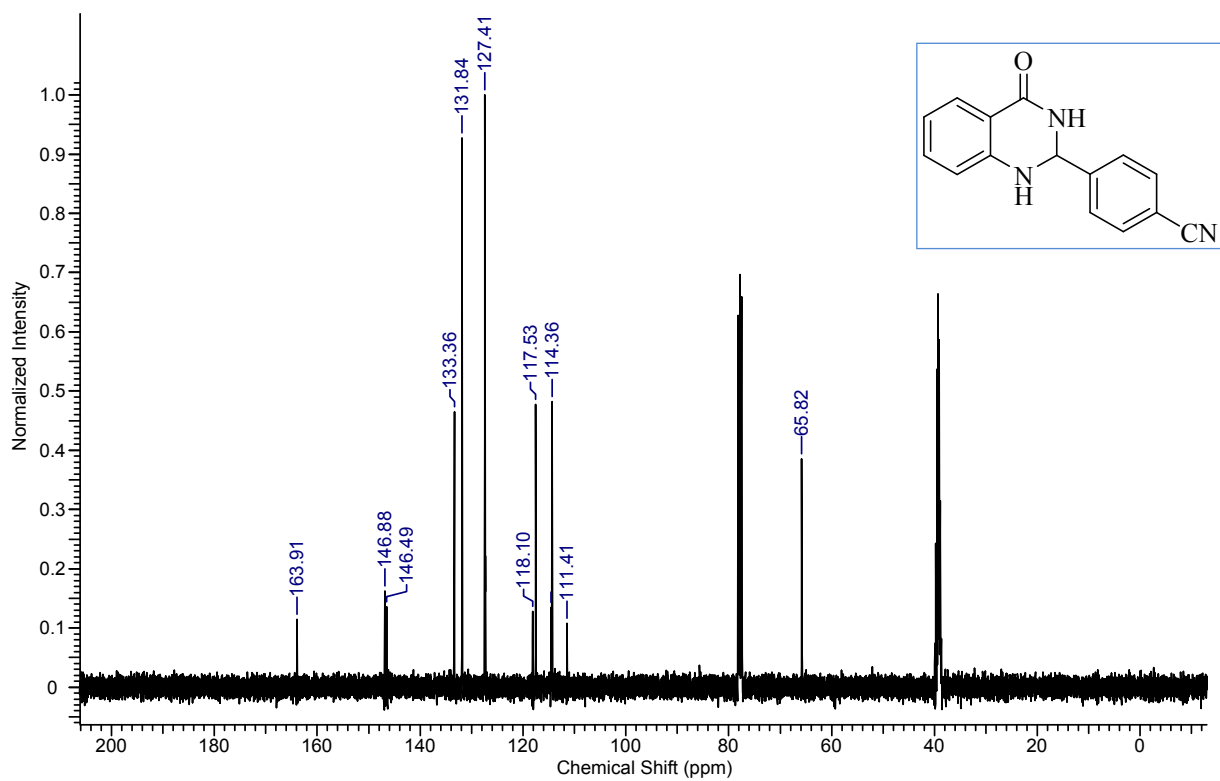

3. 6c

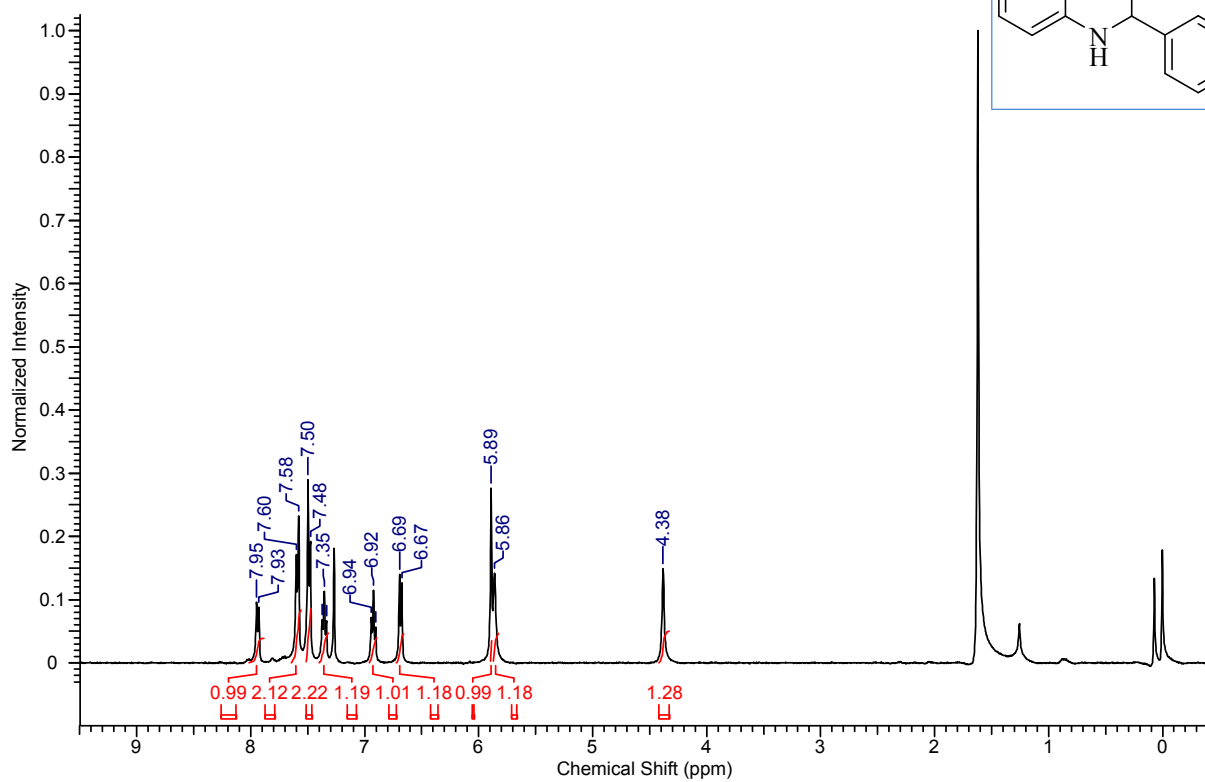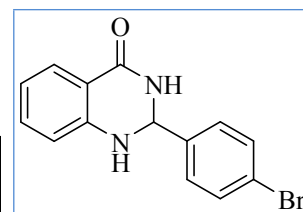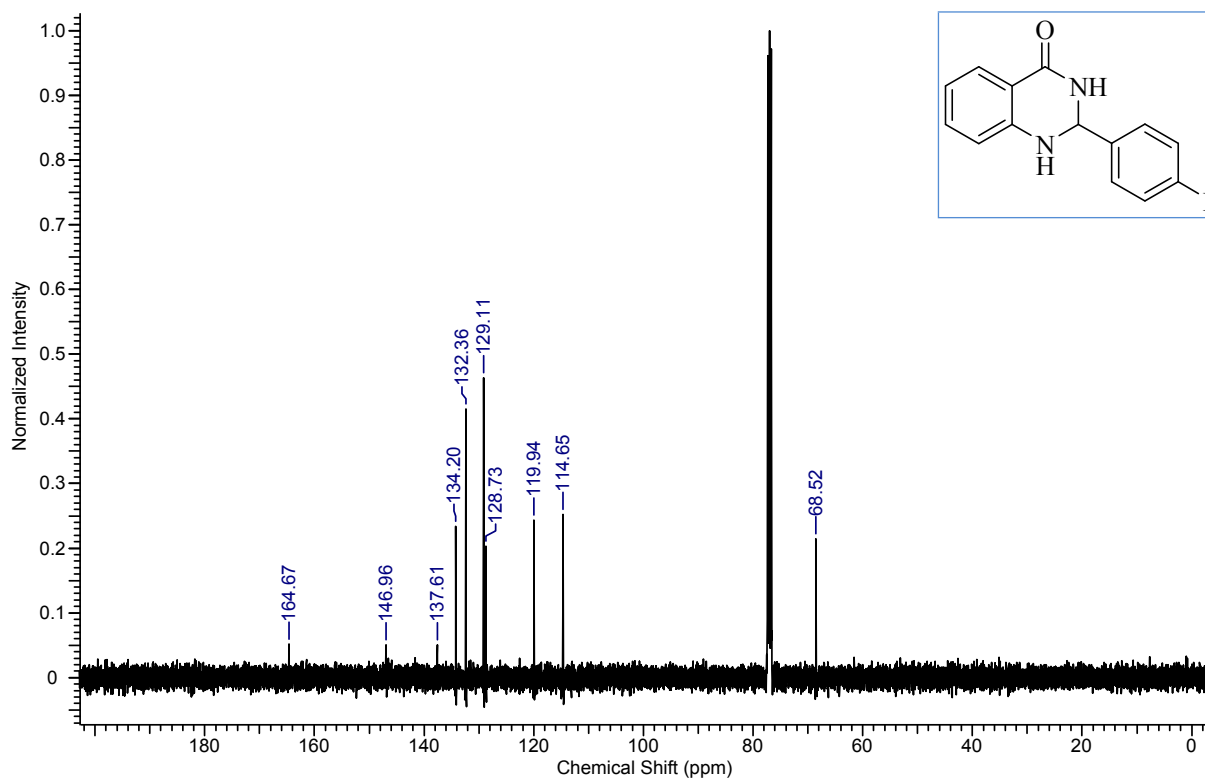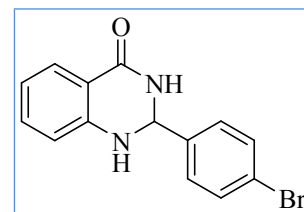

4. 6d

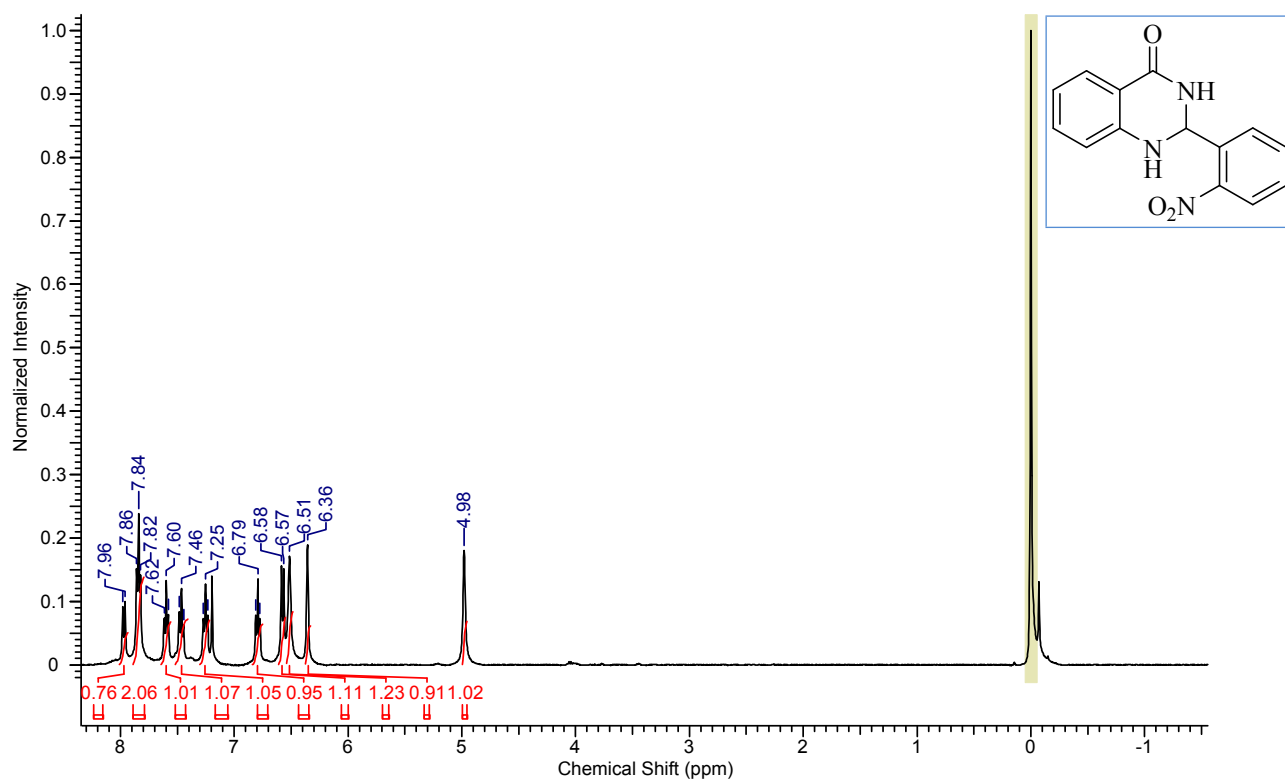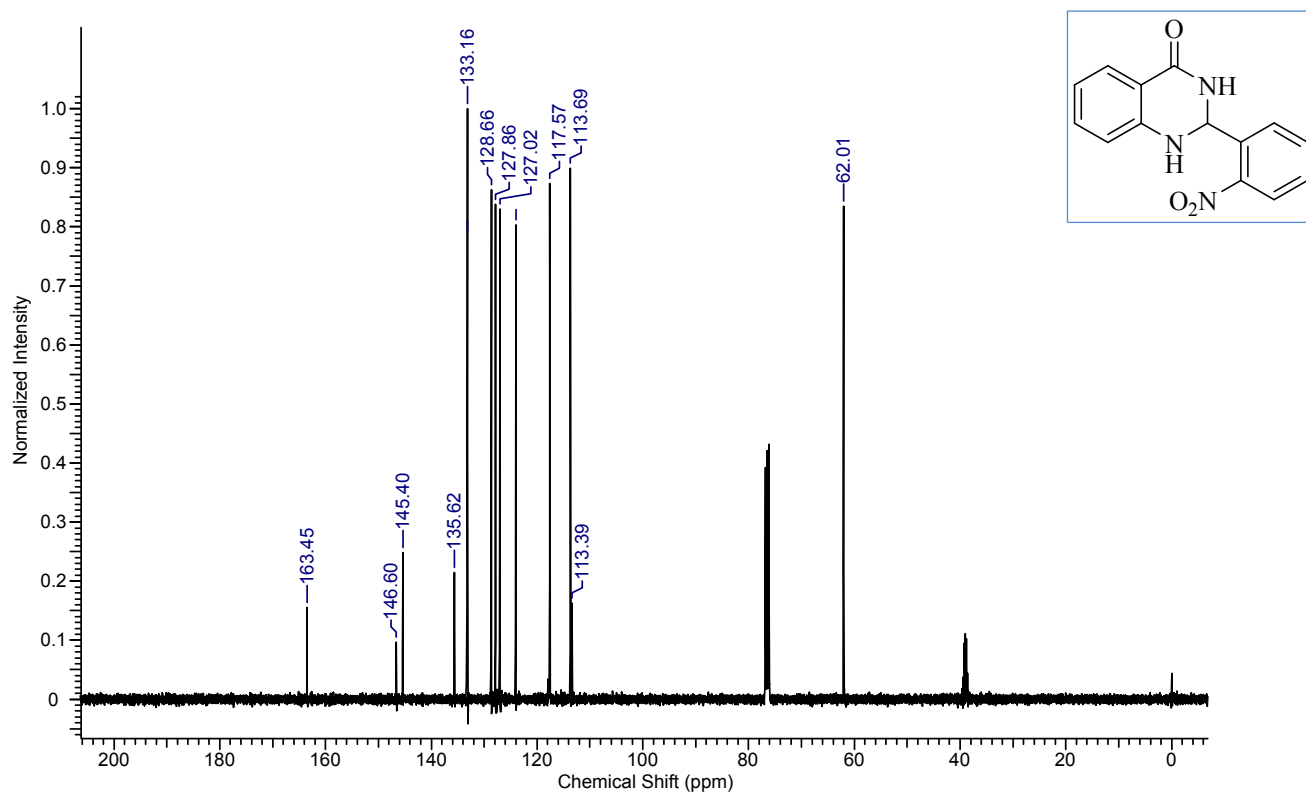

5. 6e

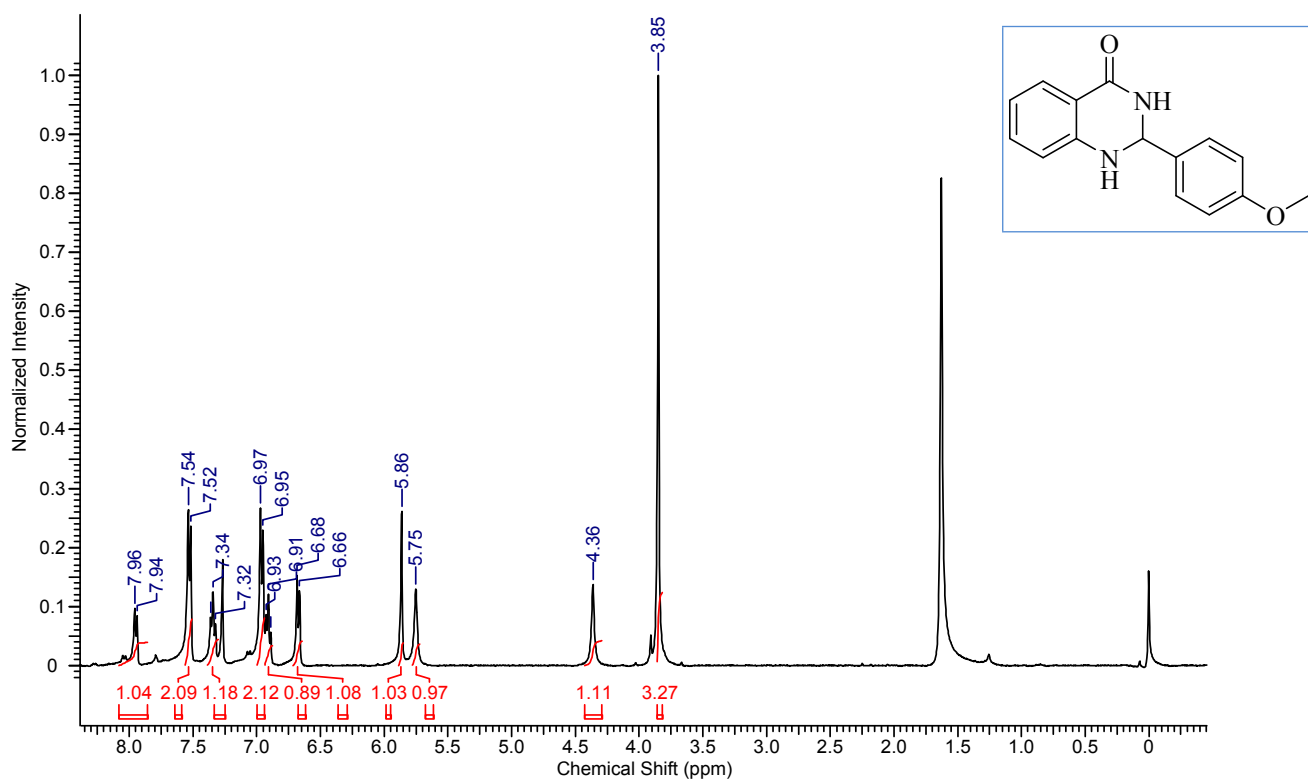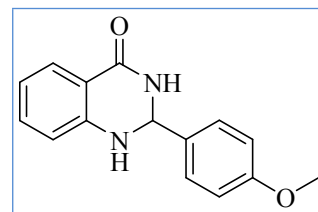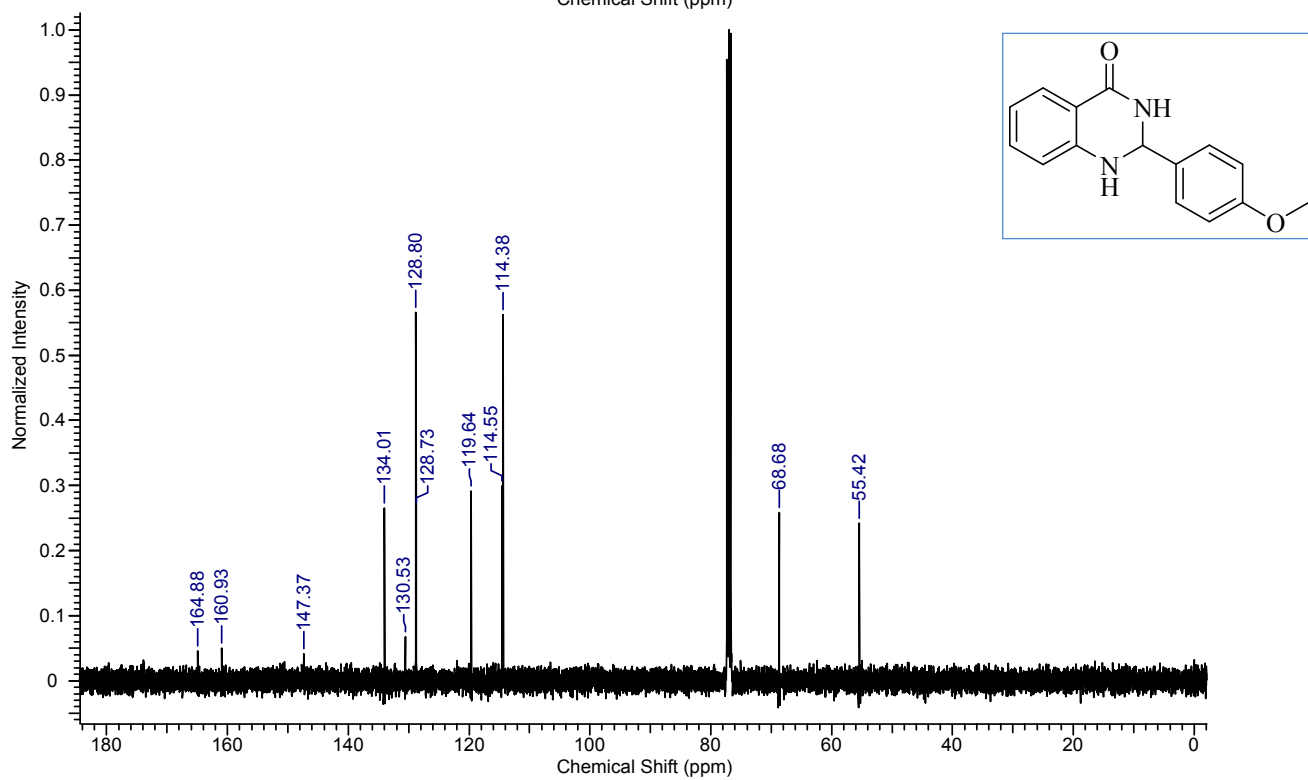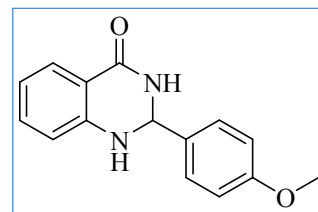

## 6. 6f

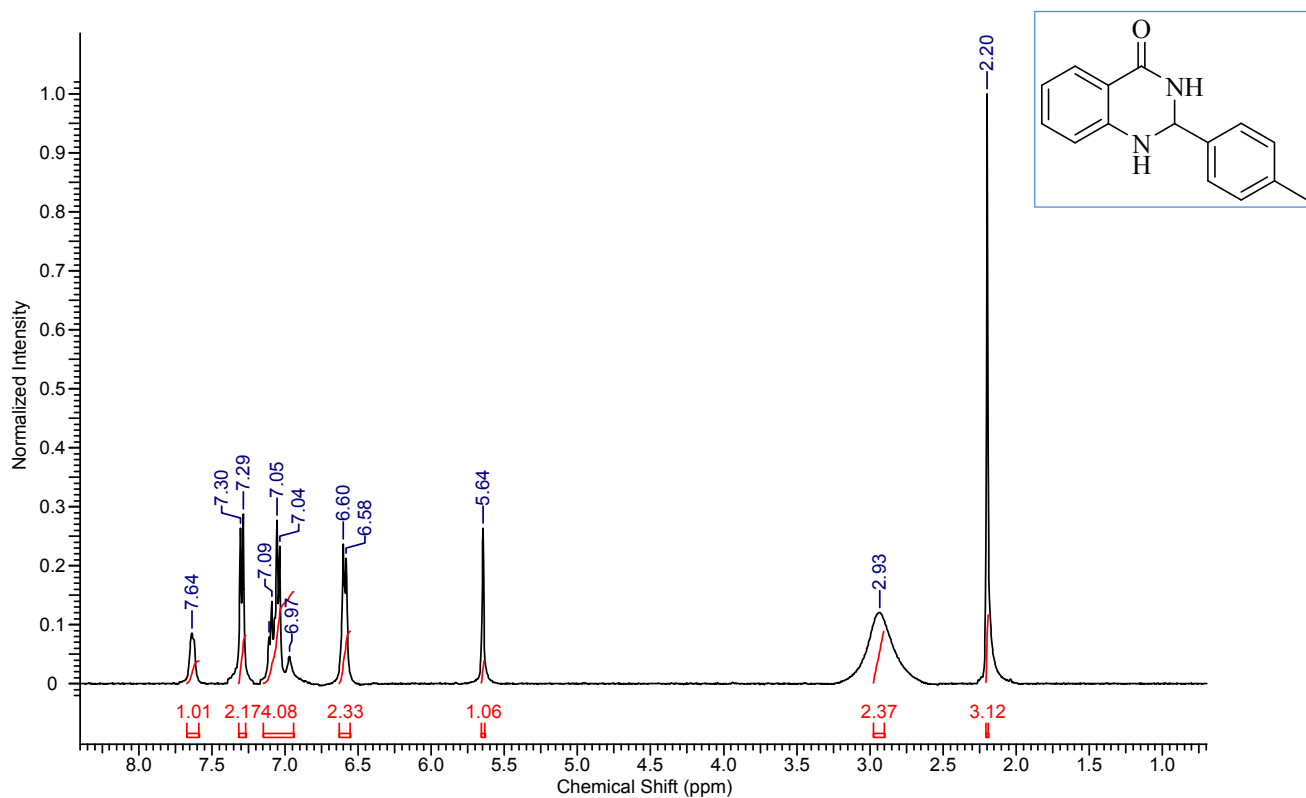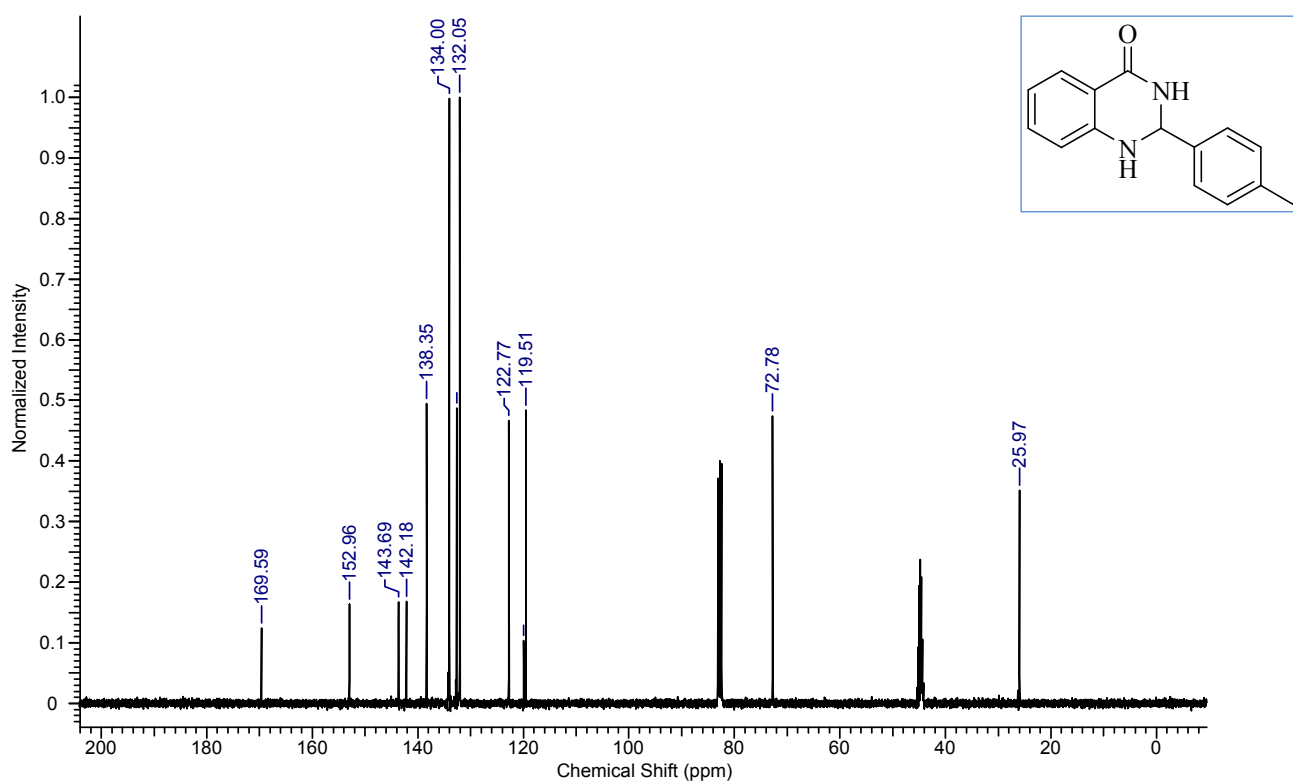

7. **6g**

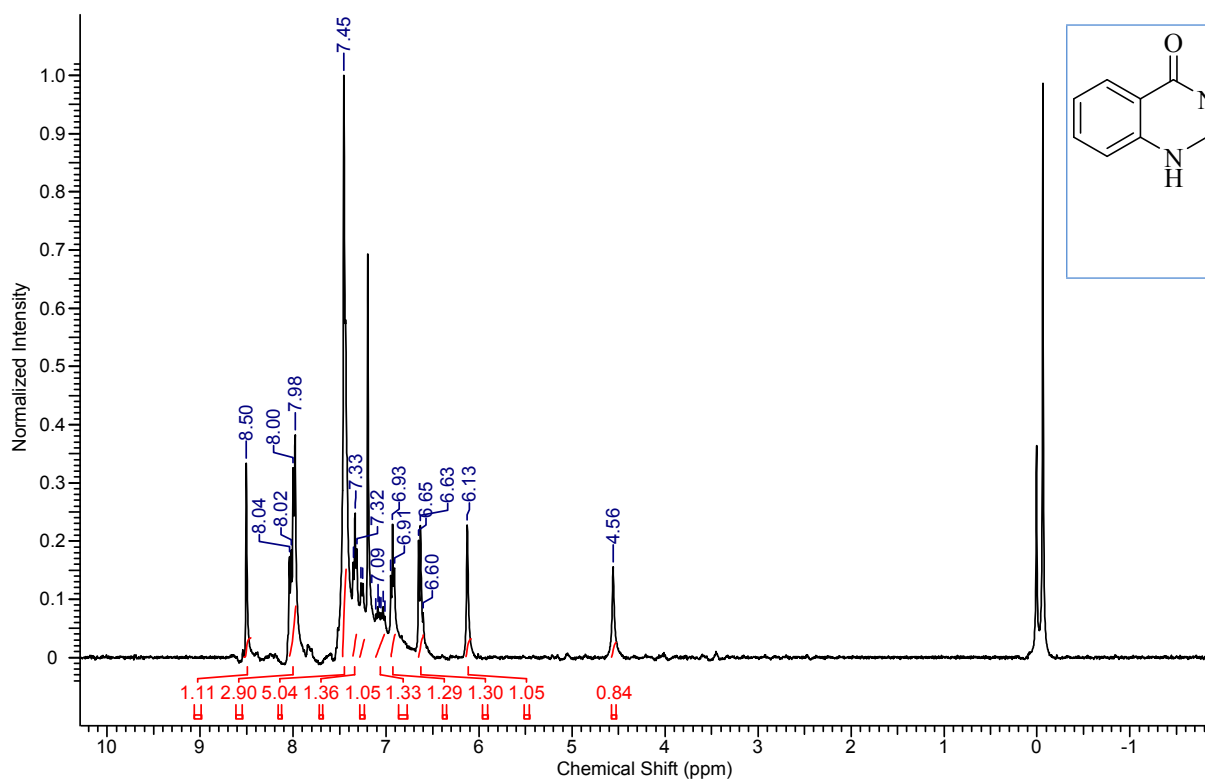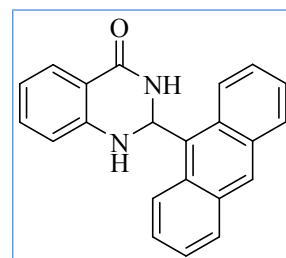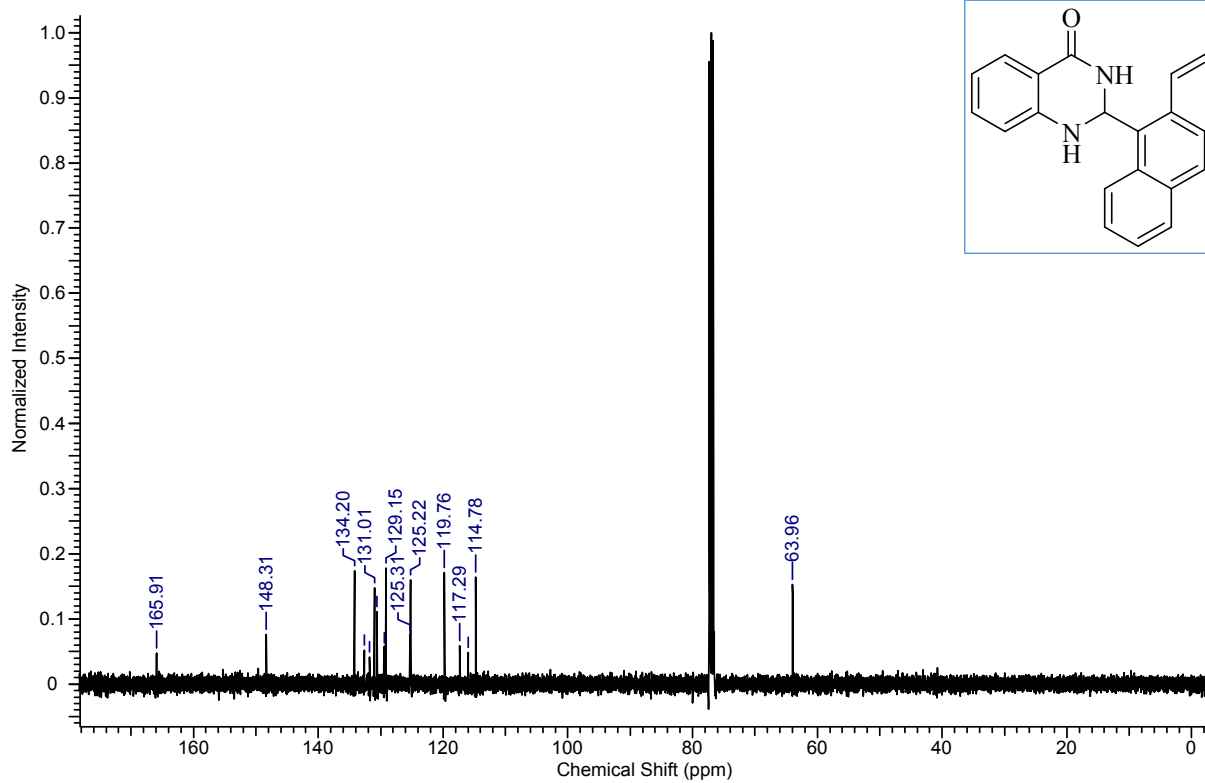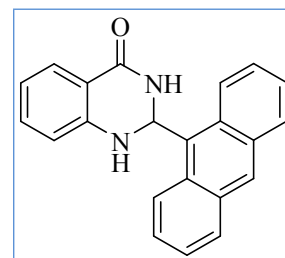



8. 6h

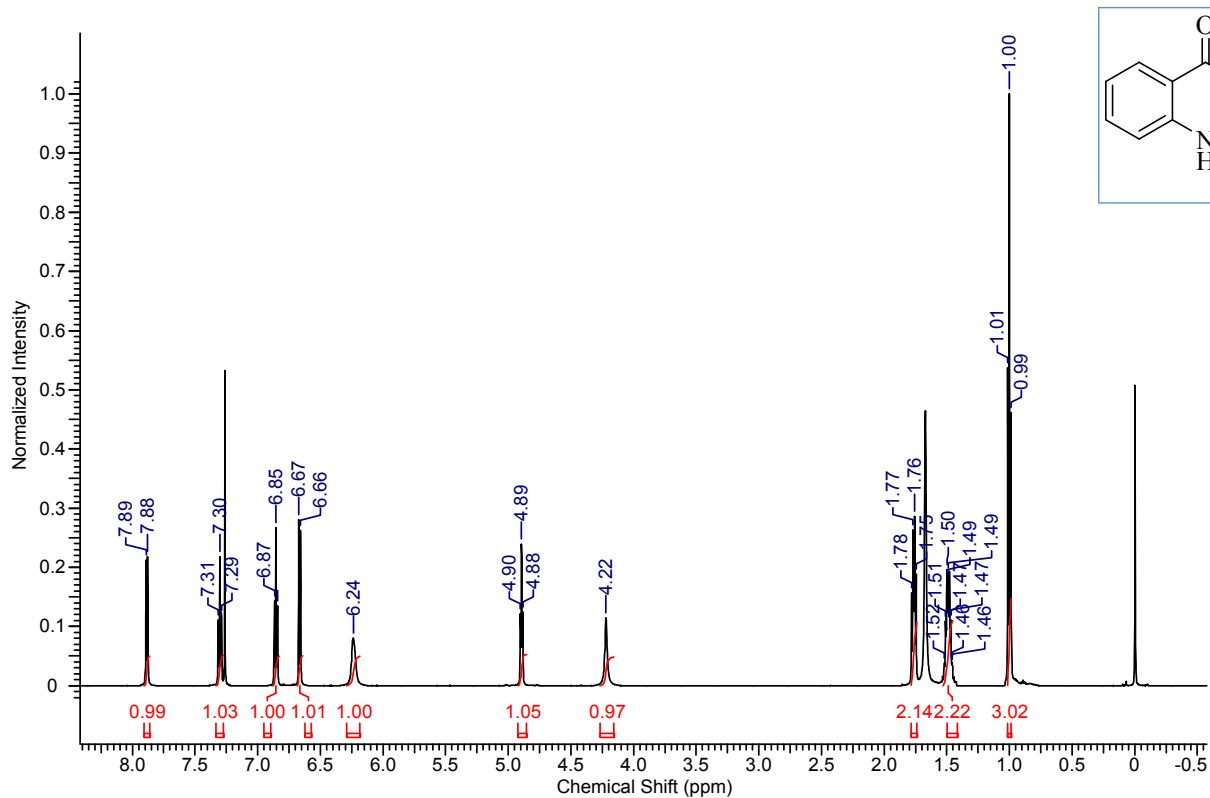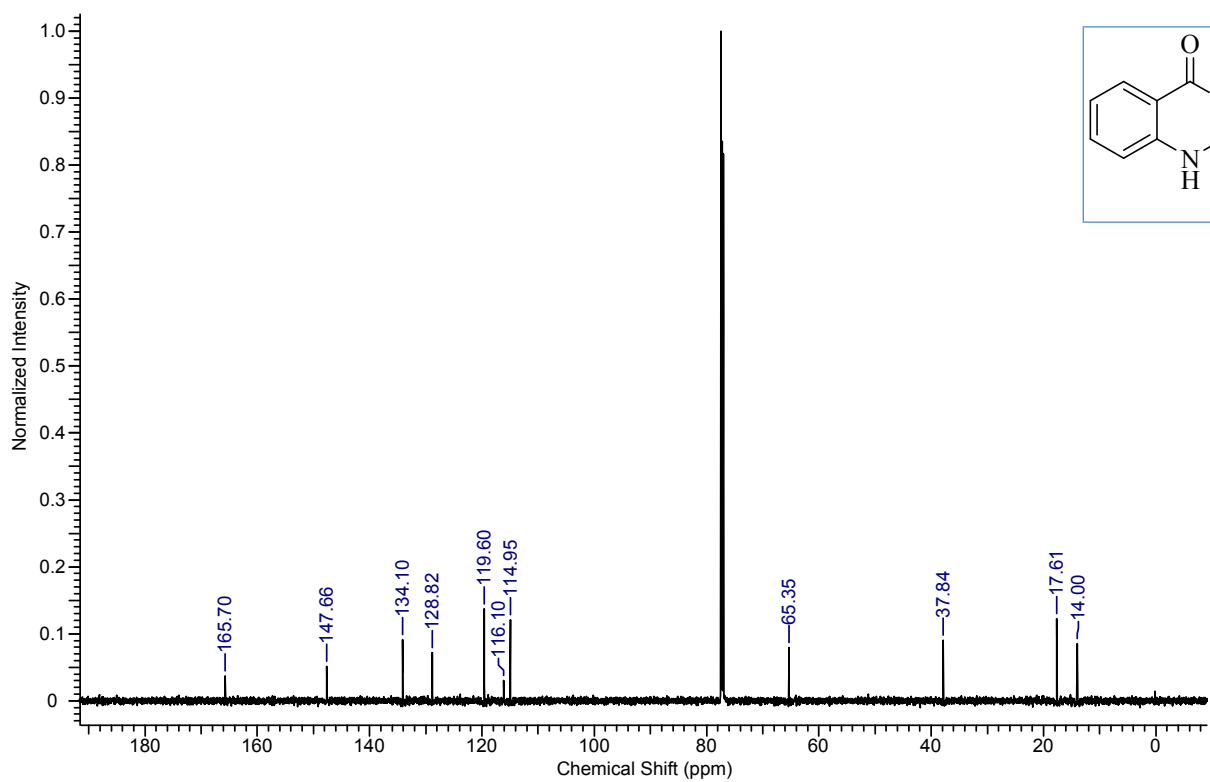

9. 6i

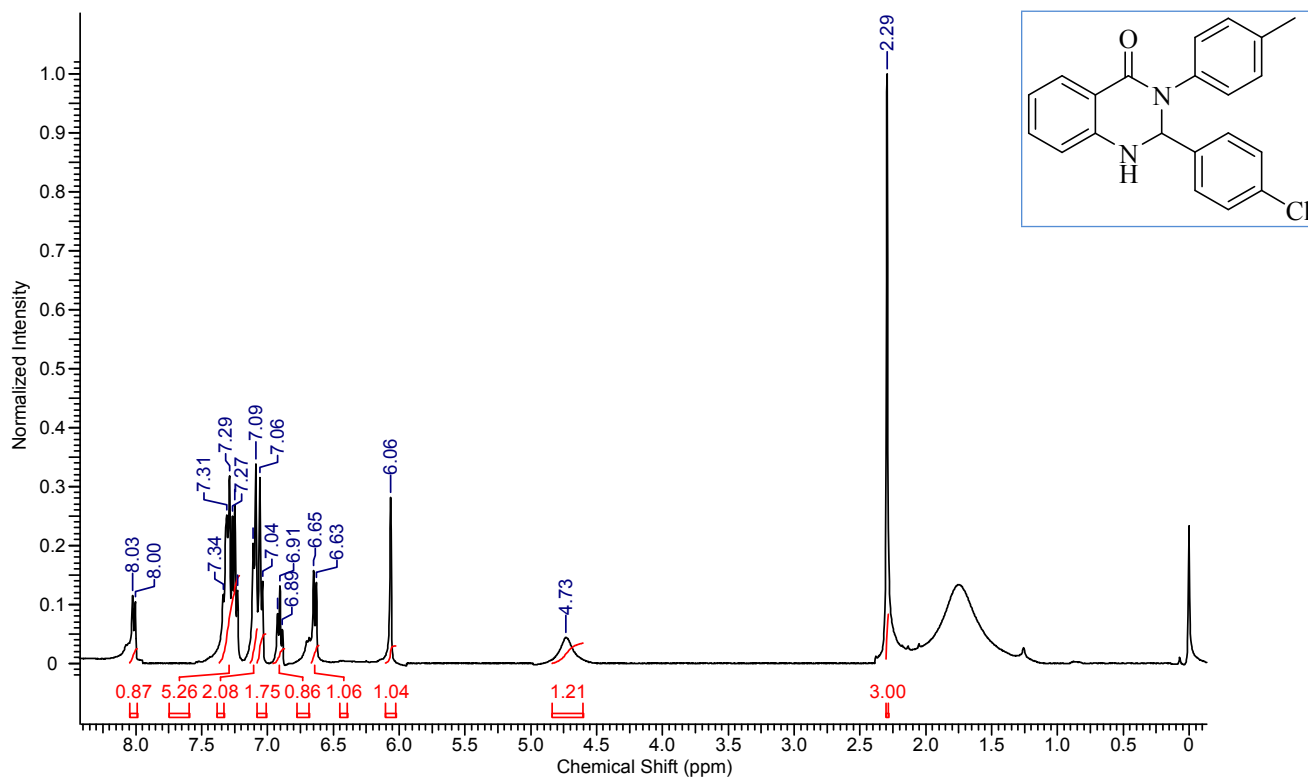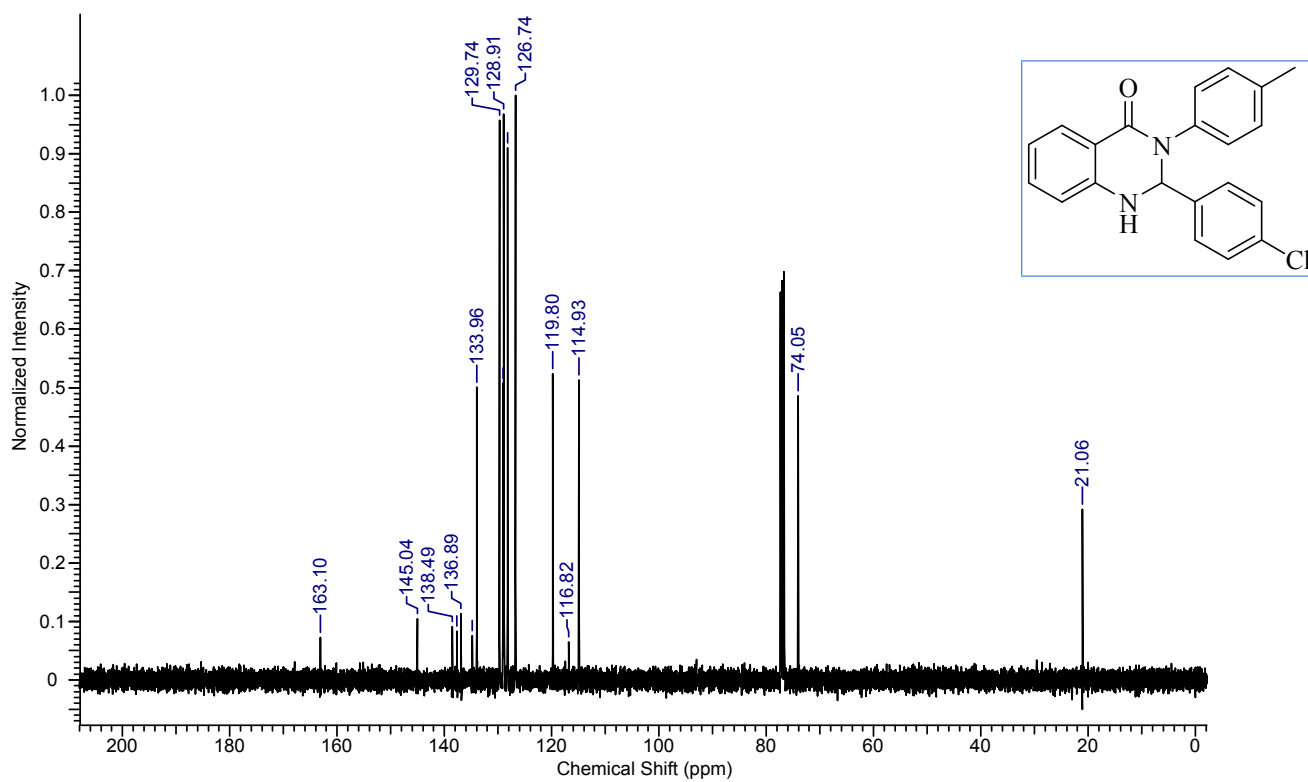

10. 6j

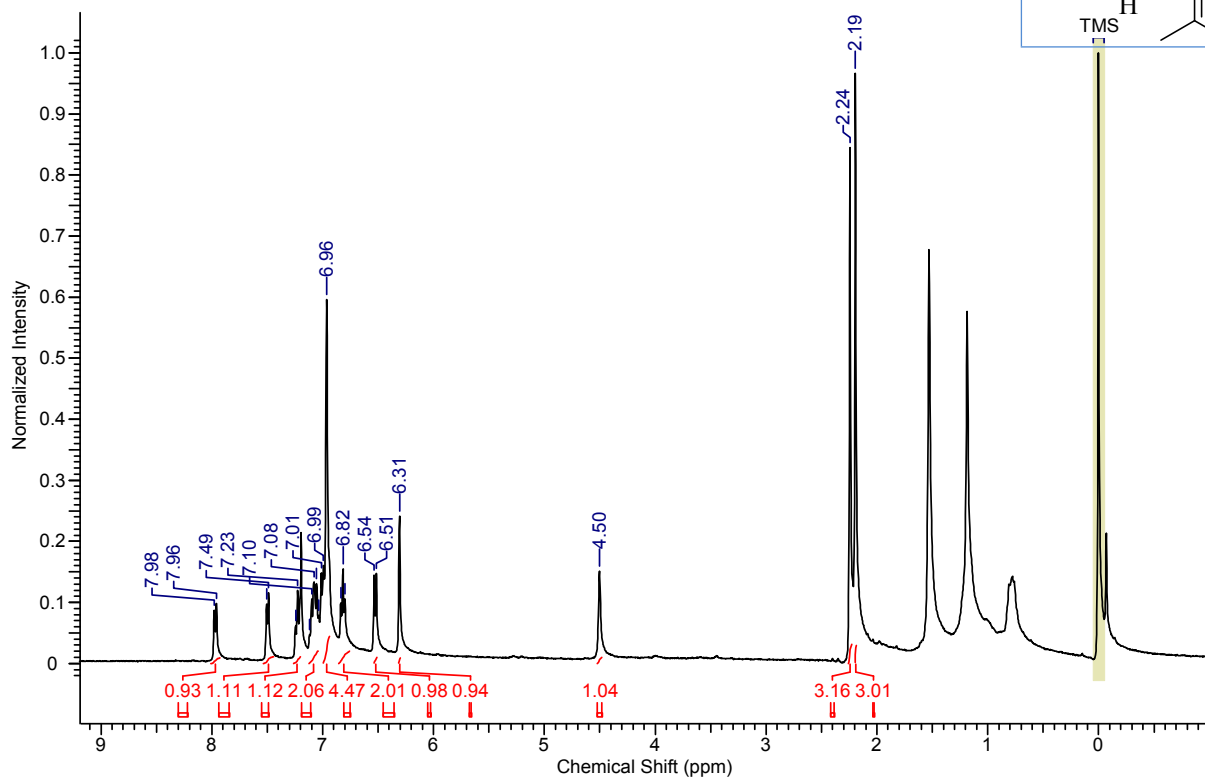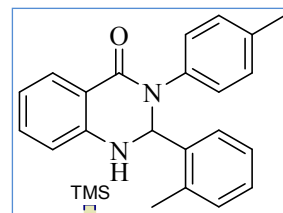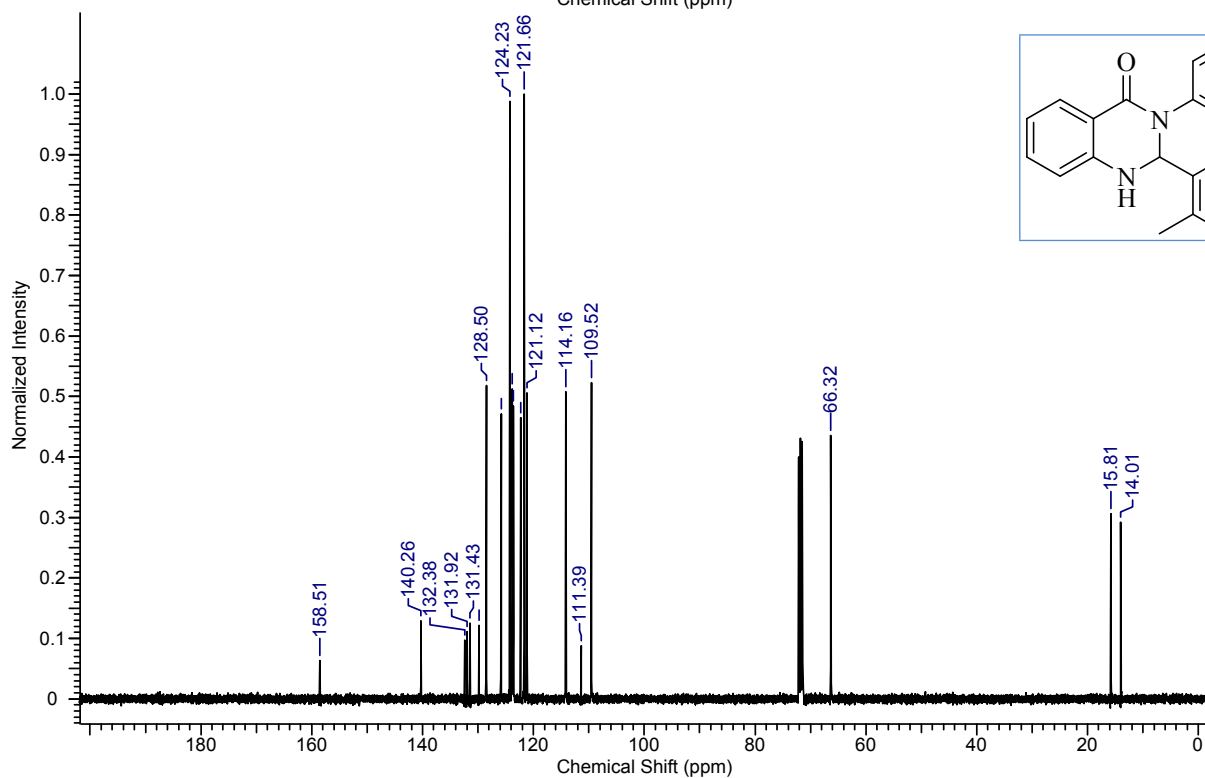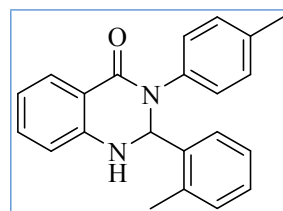

11. 6k

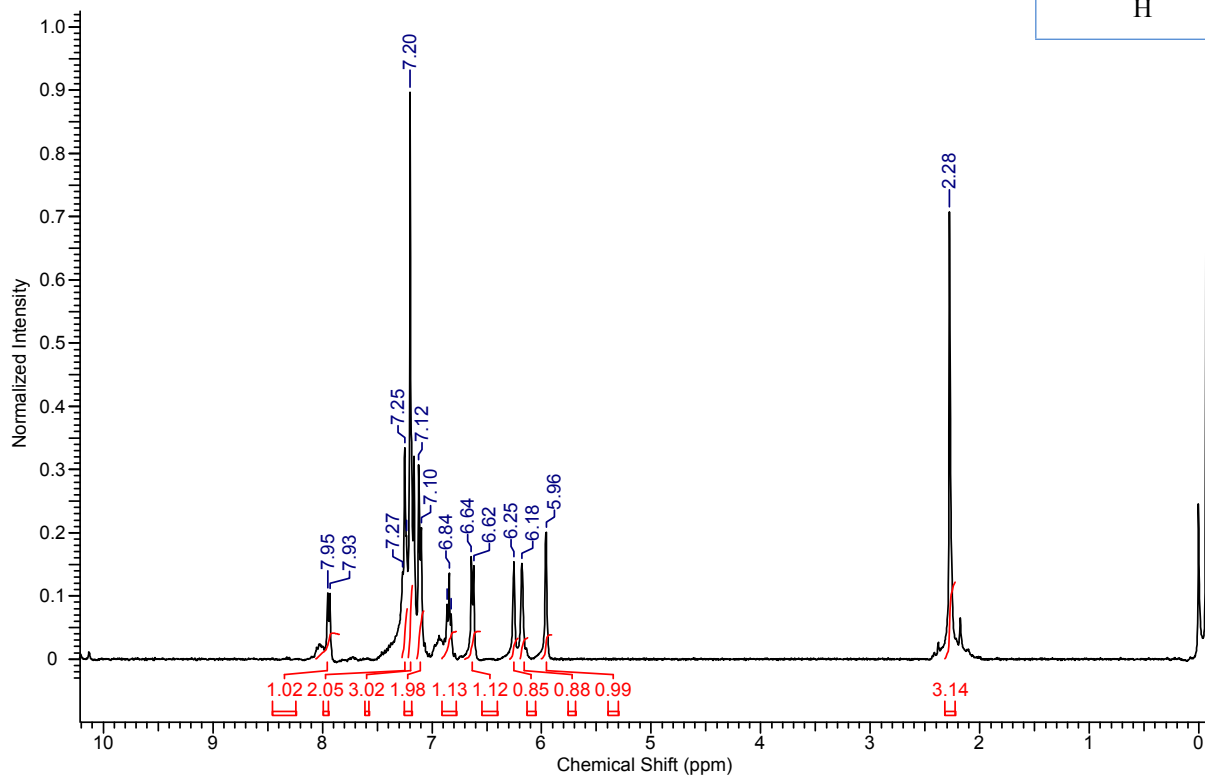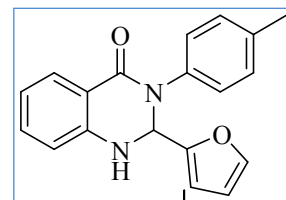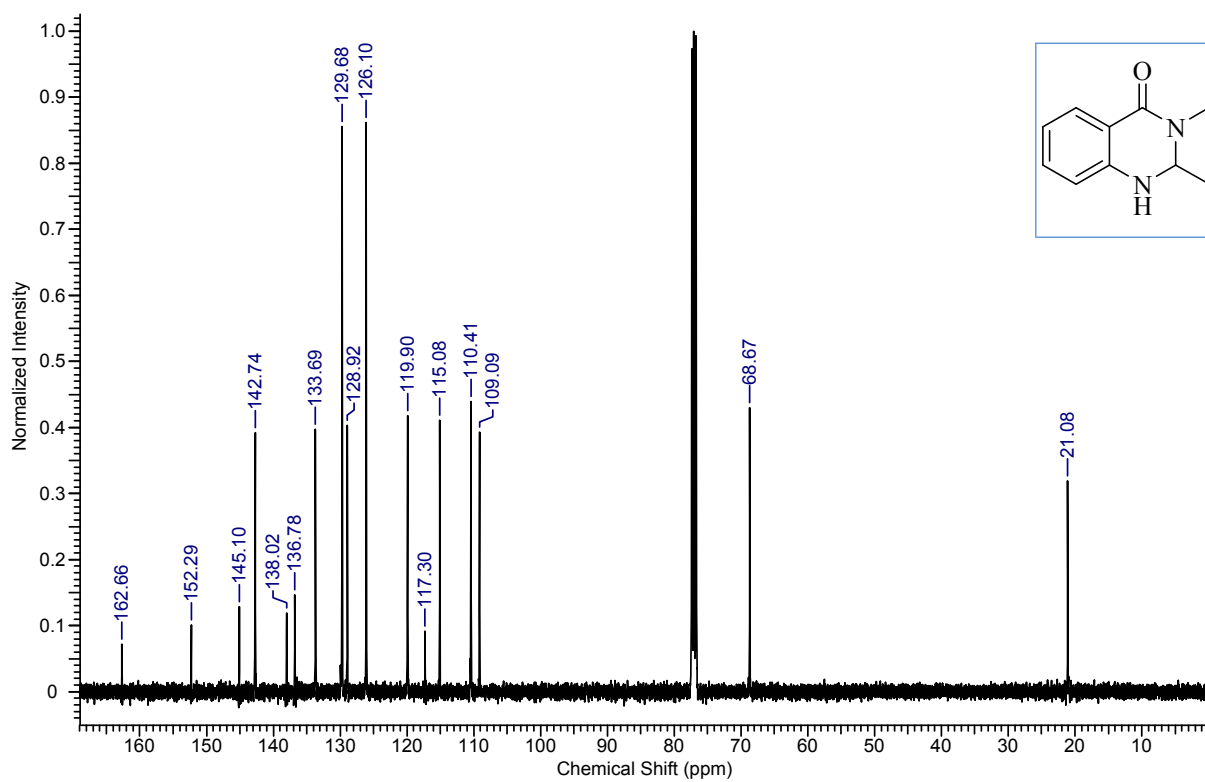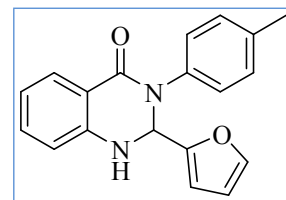

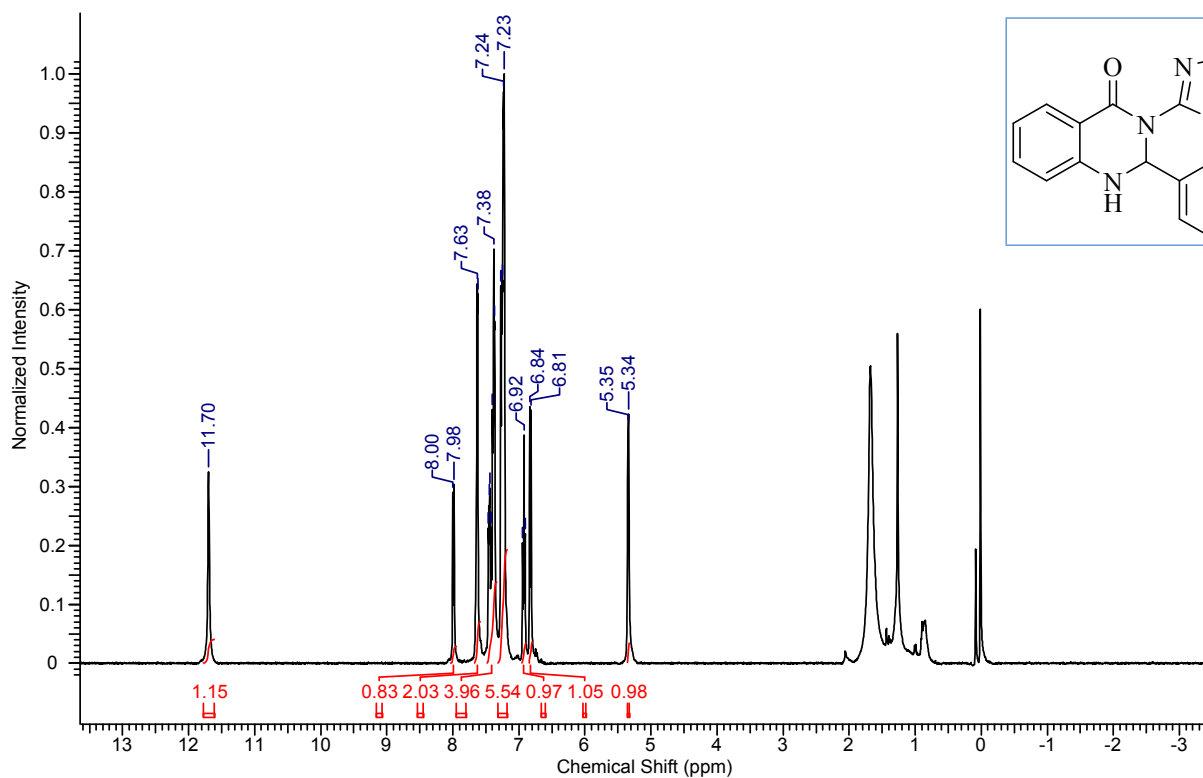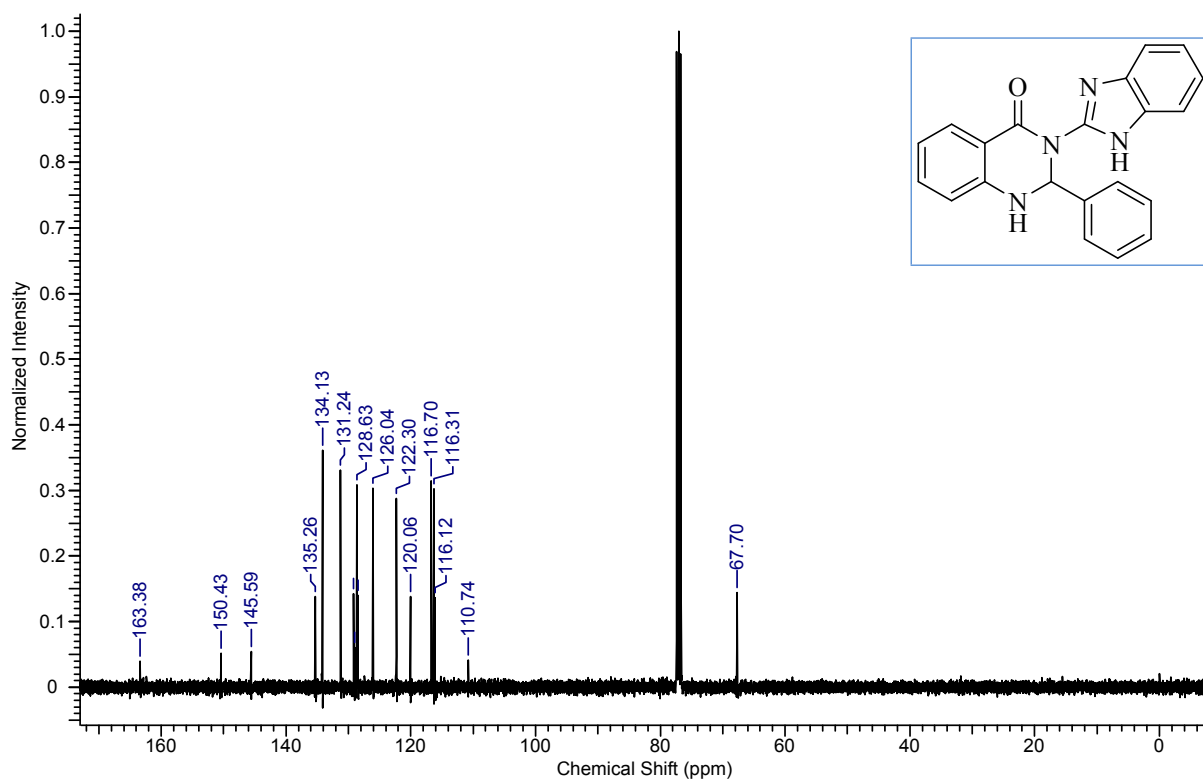

13. 6m

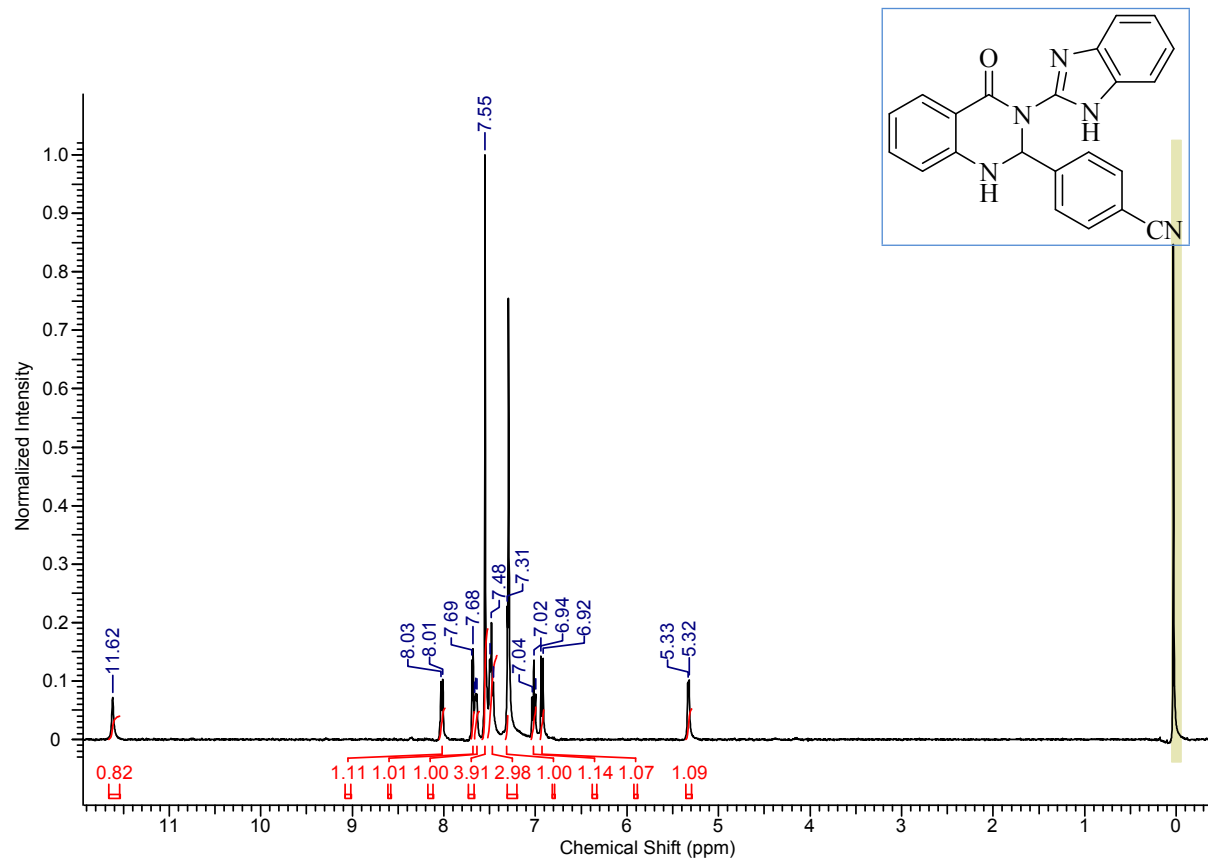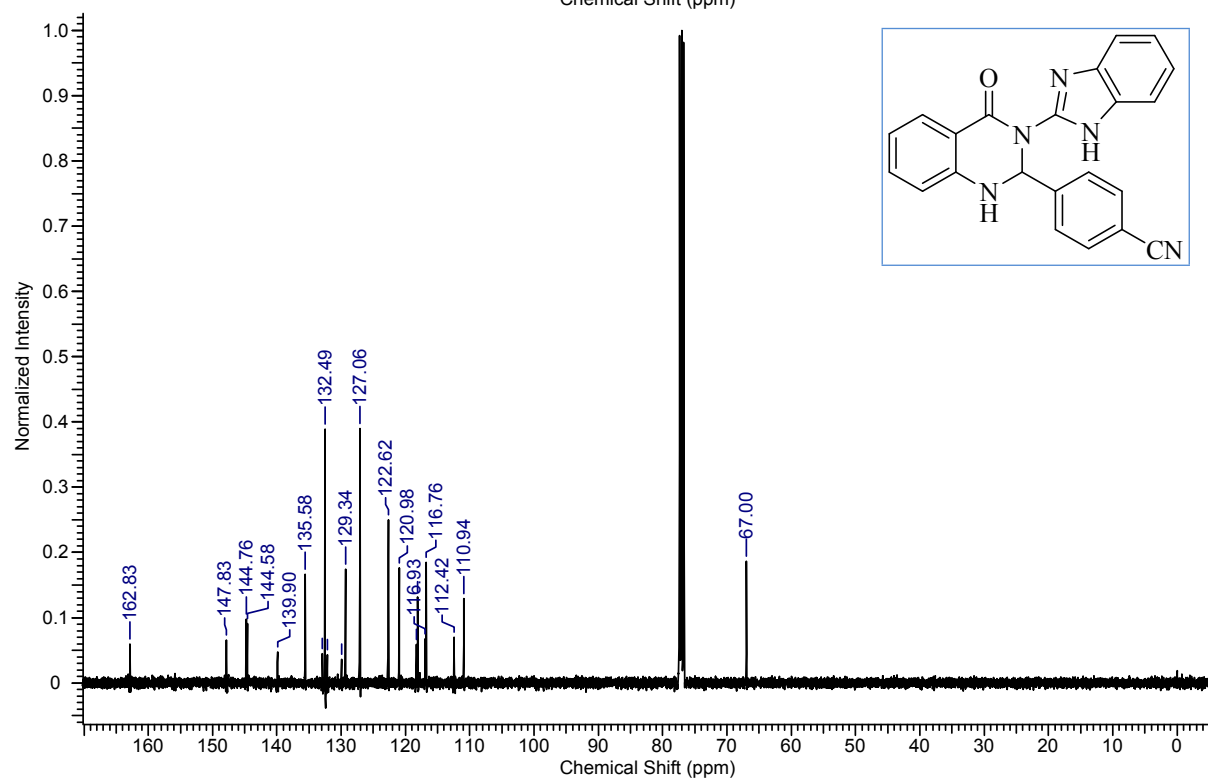

14. **6n**

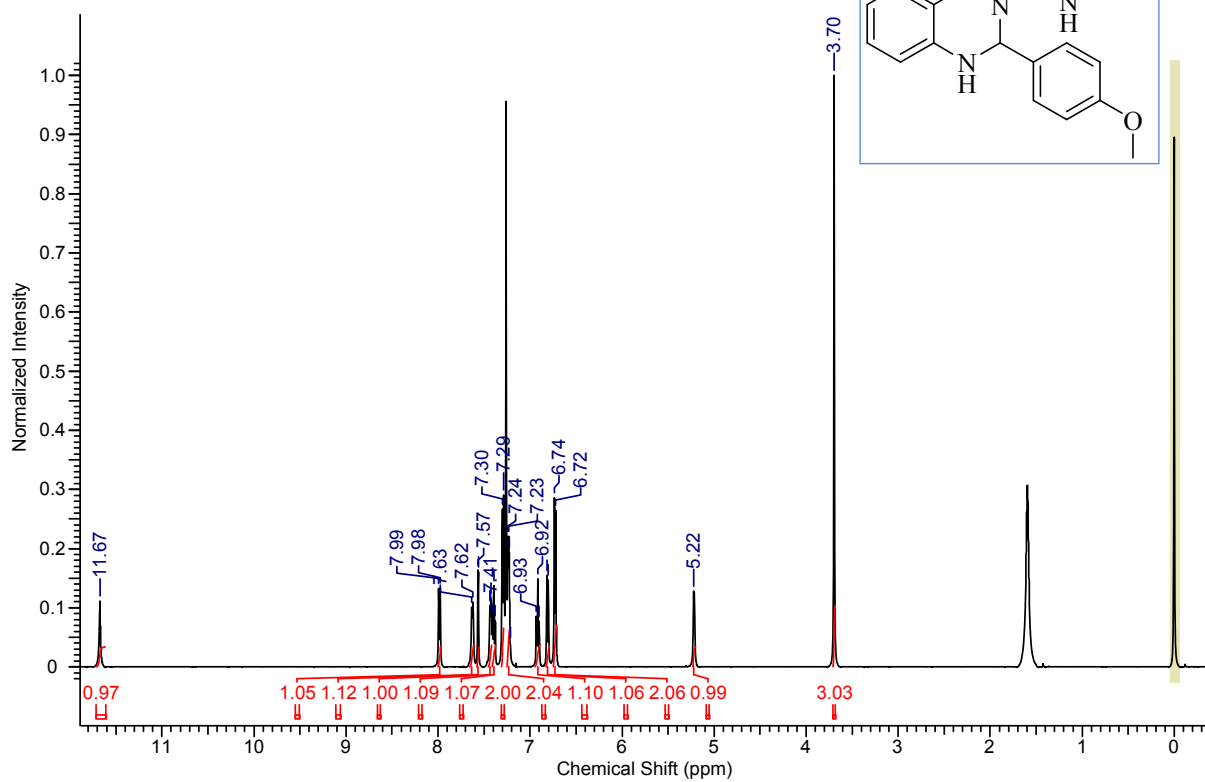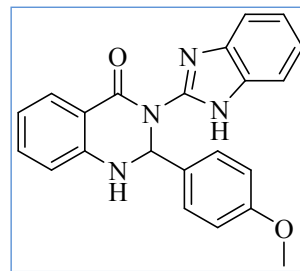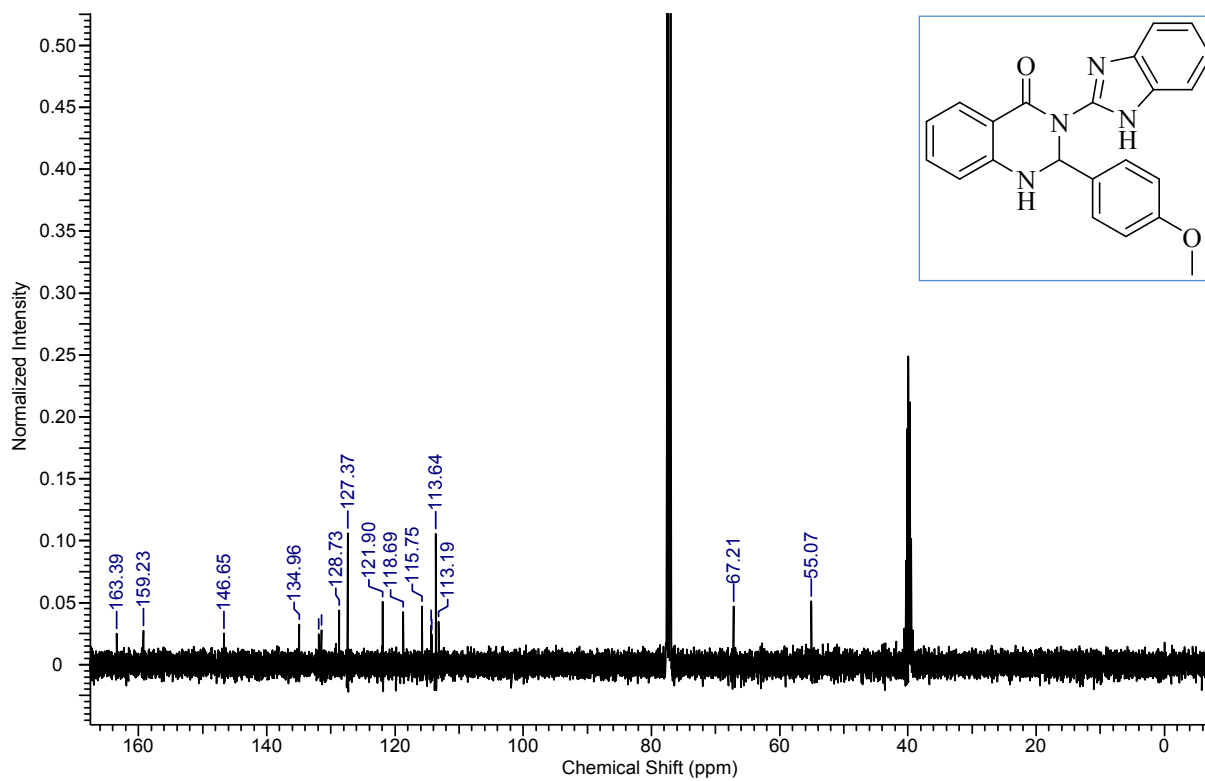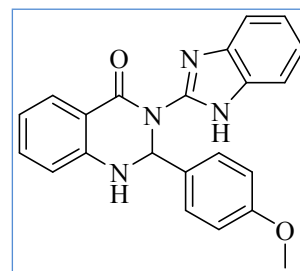

15. **6o**

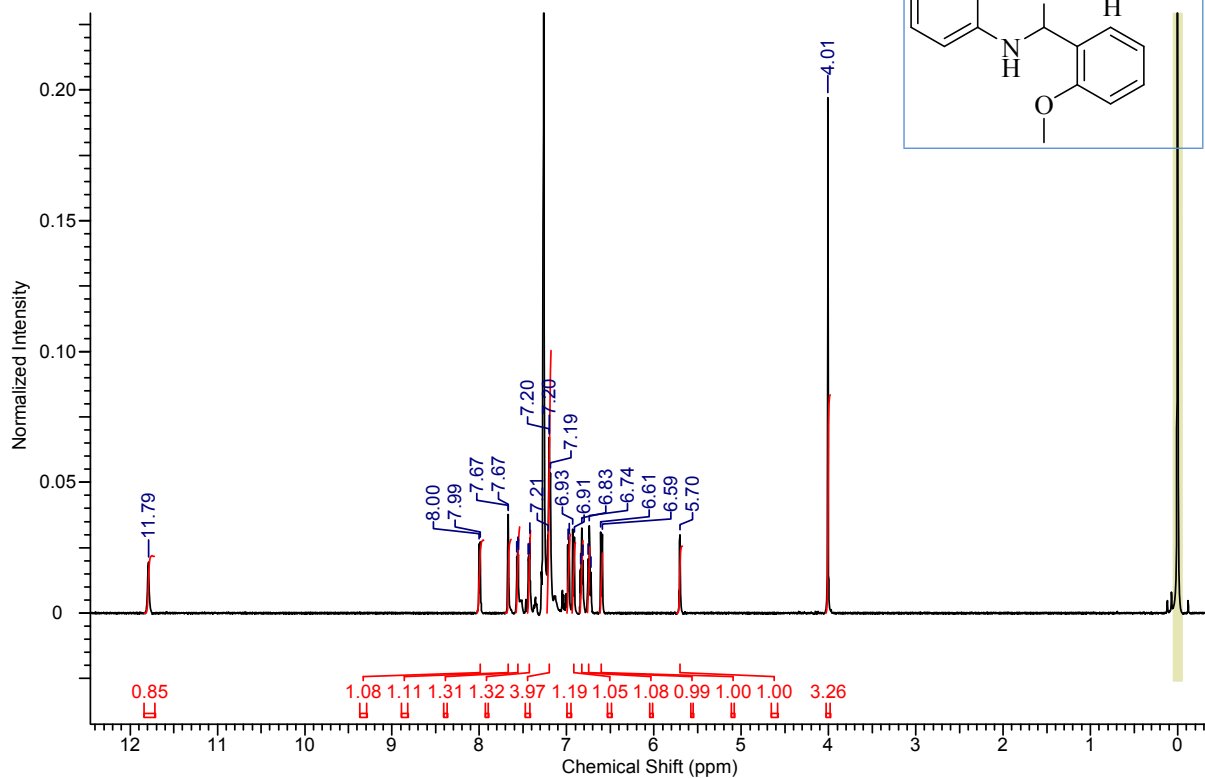

16. **6p**

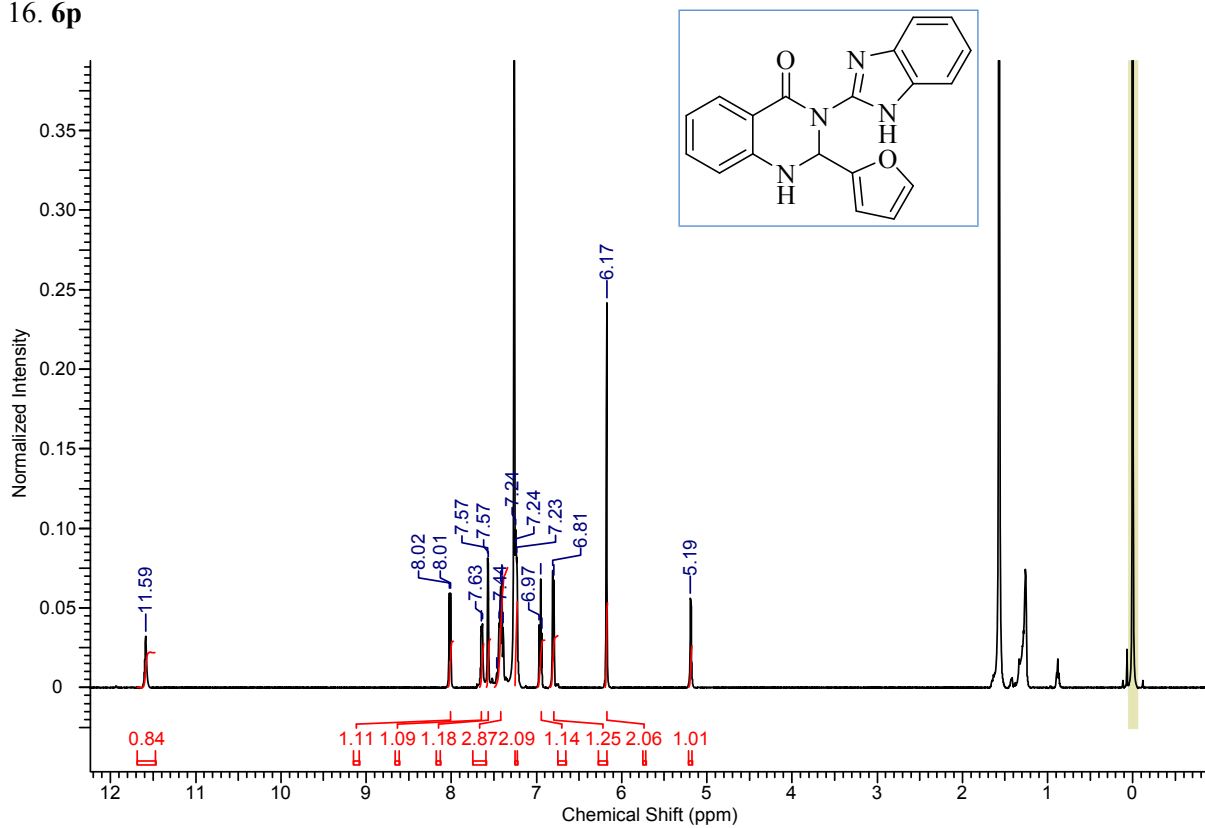



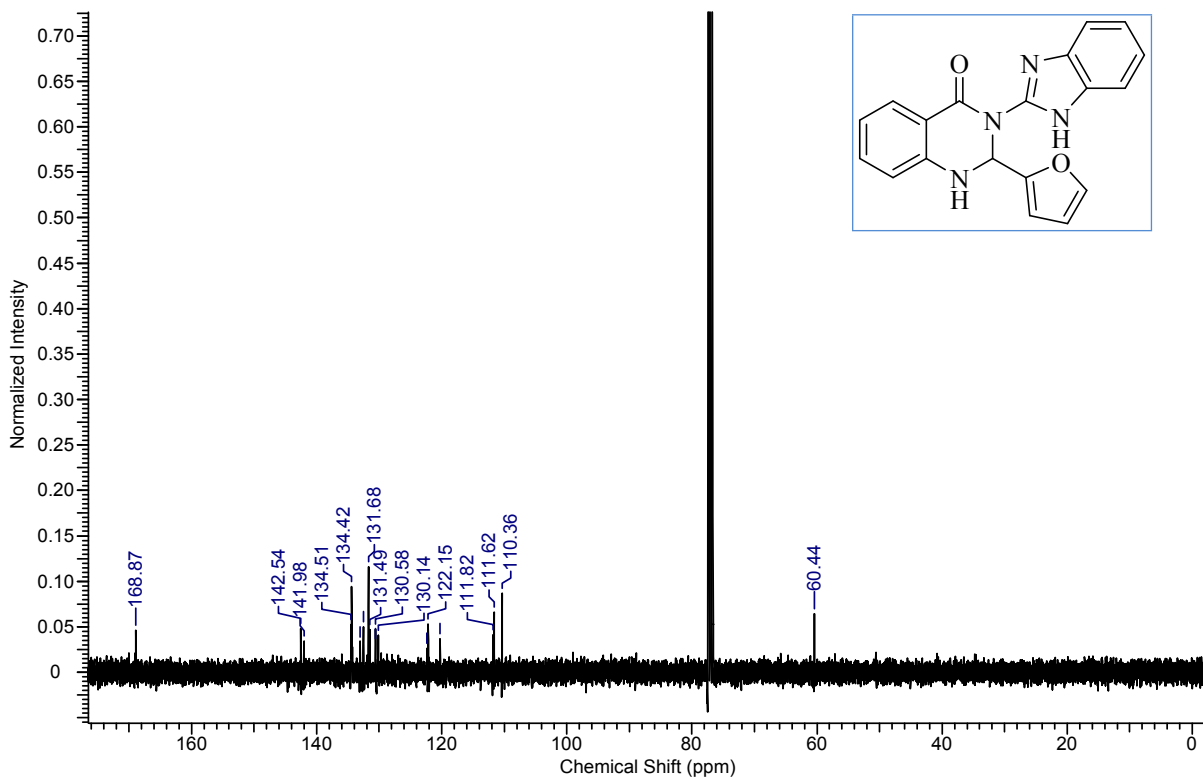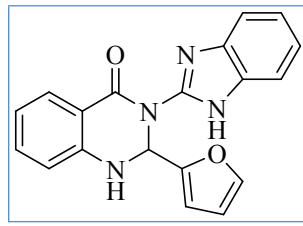

17. 6q

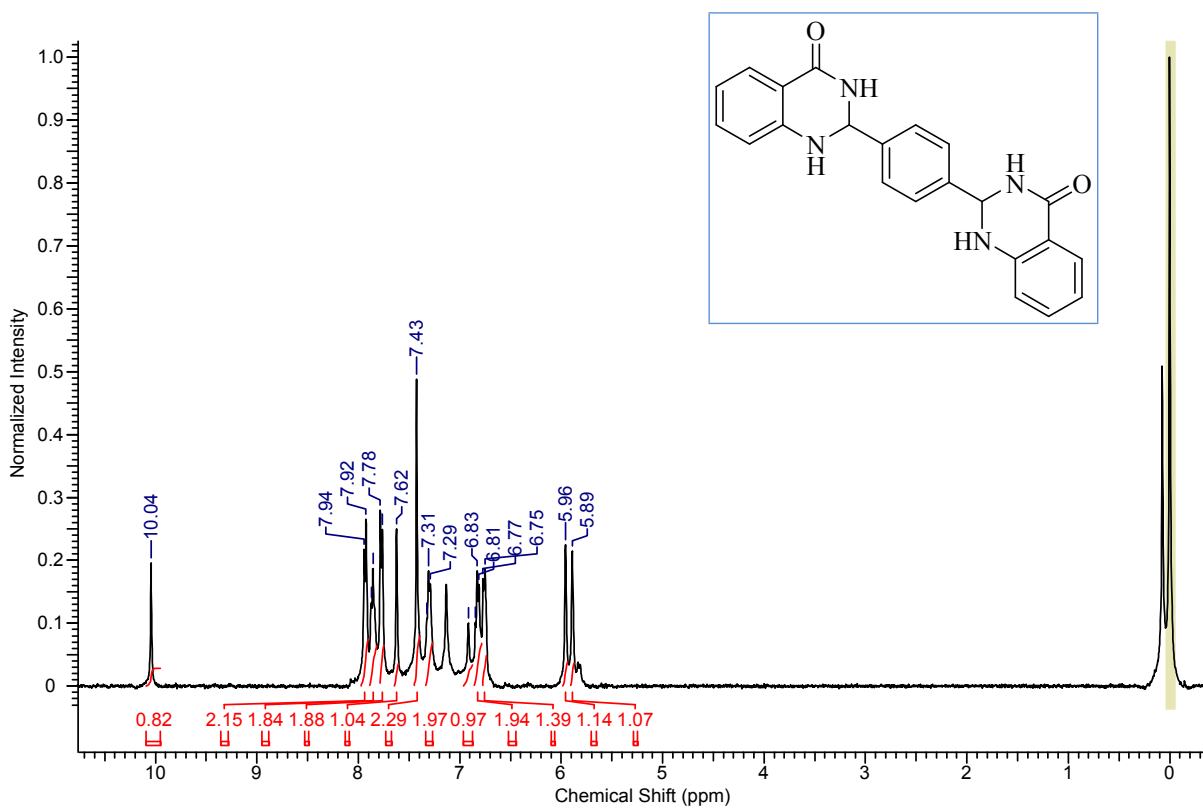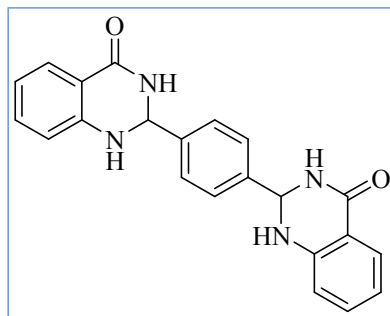

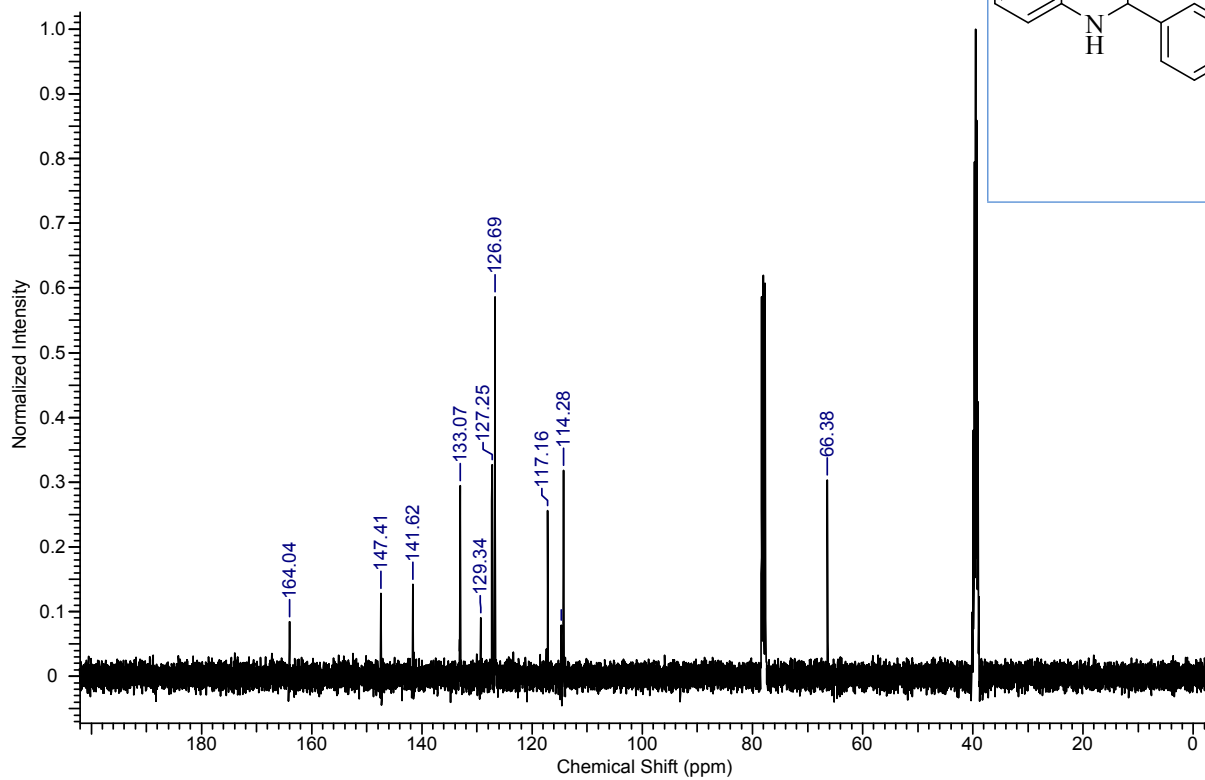

18. 6r

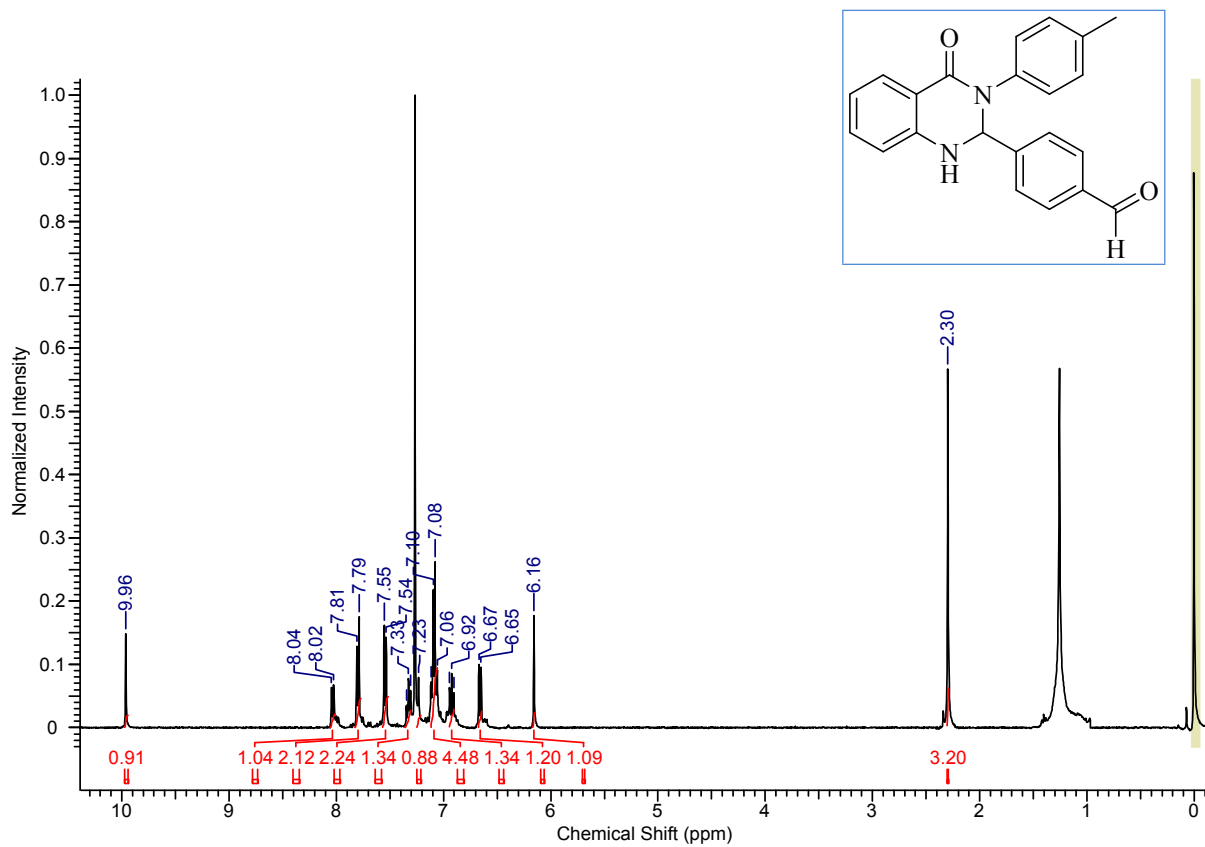

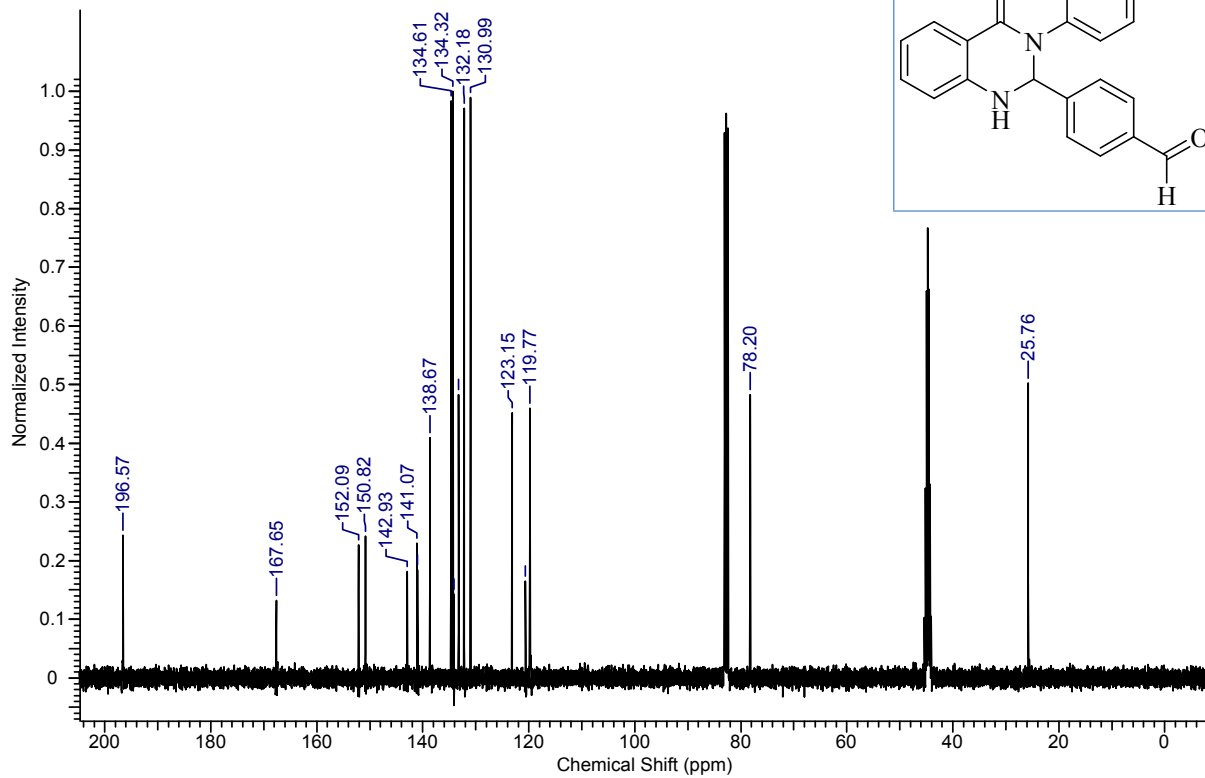

19. 6s

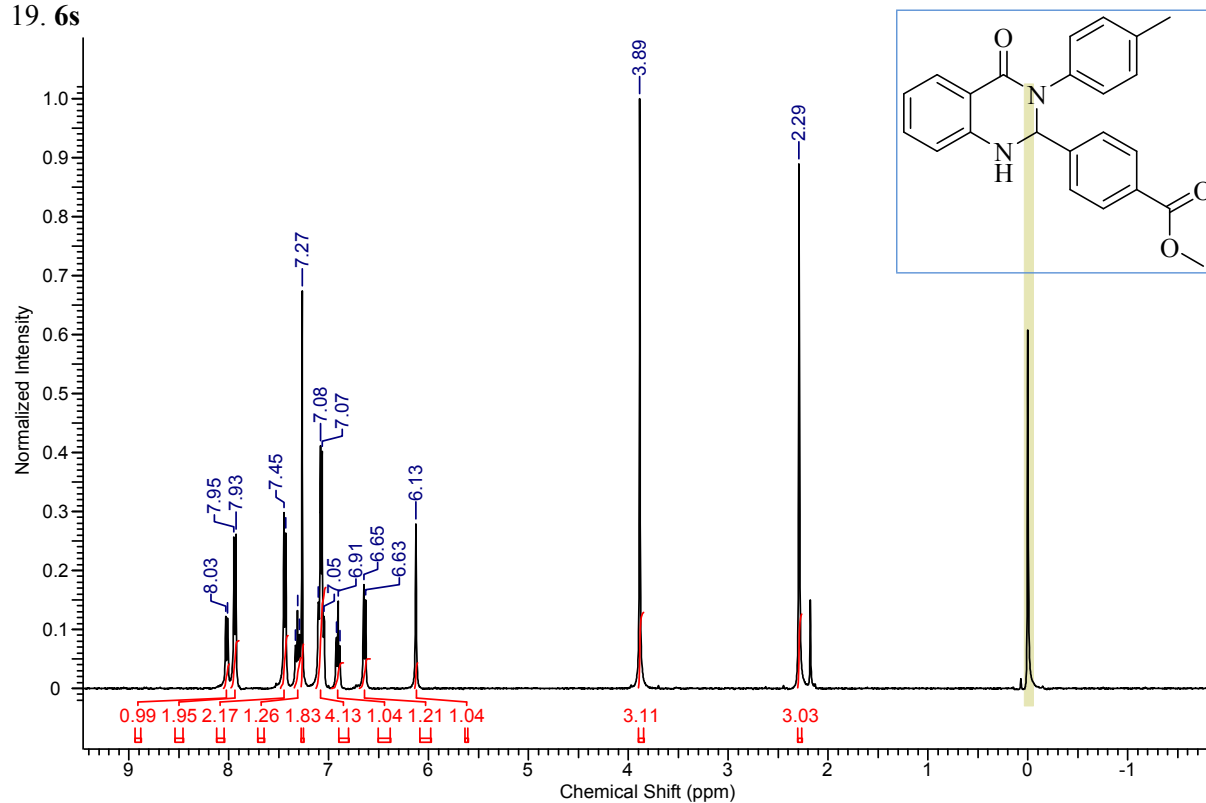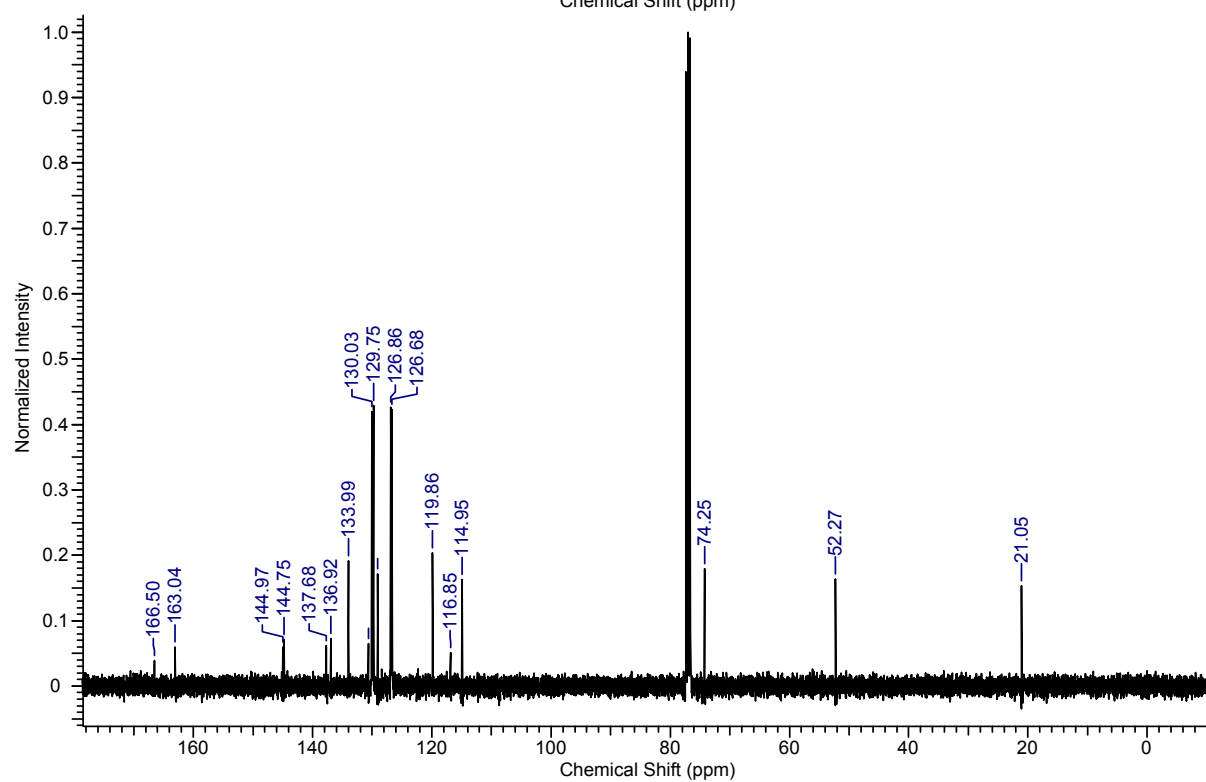

## 20. 7a

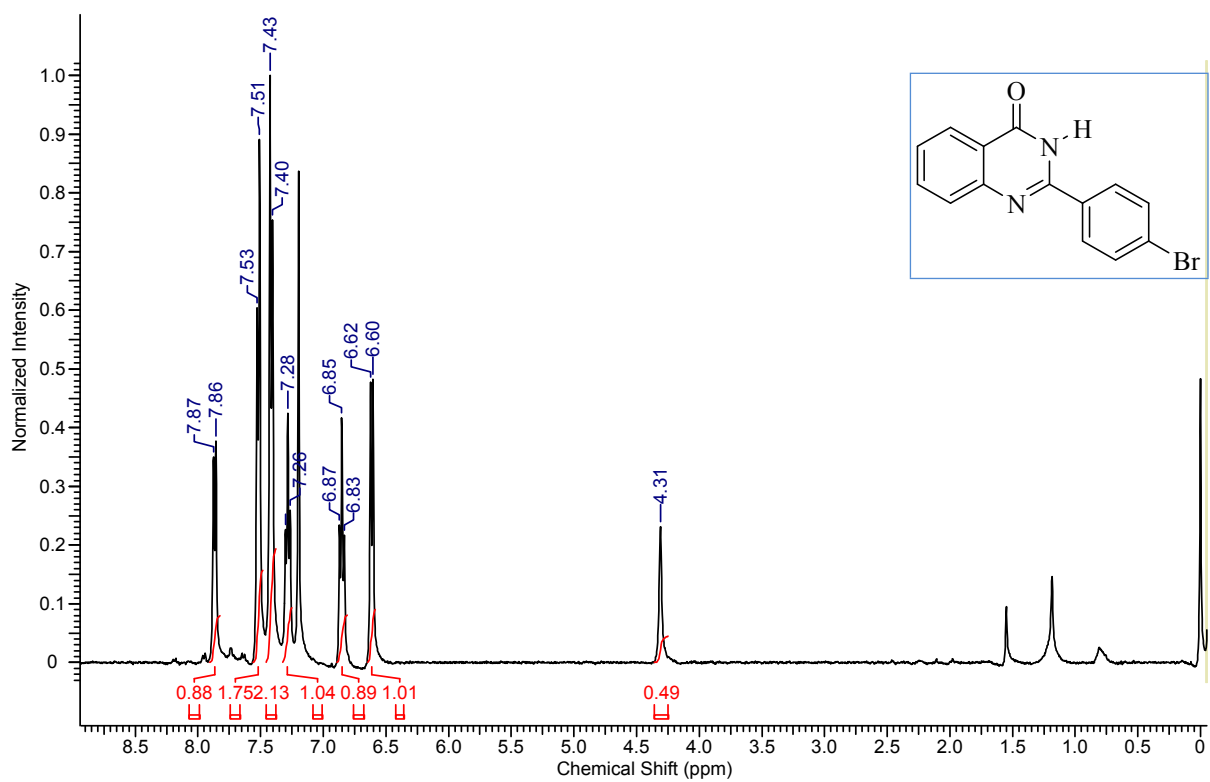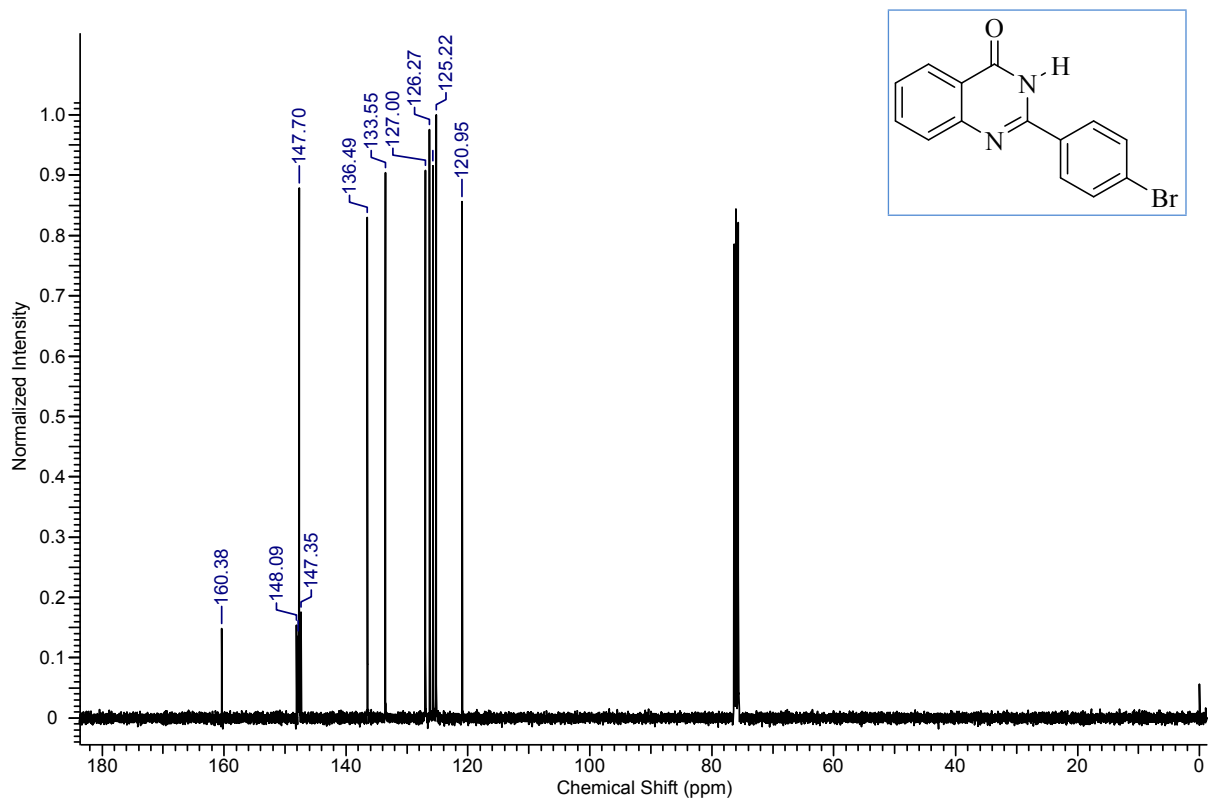

## 21. 7b

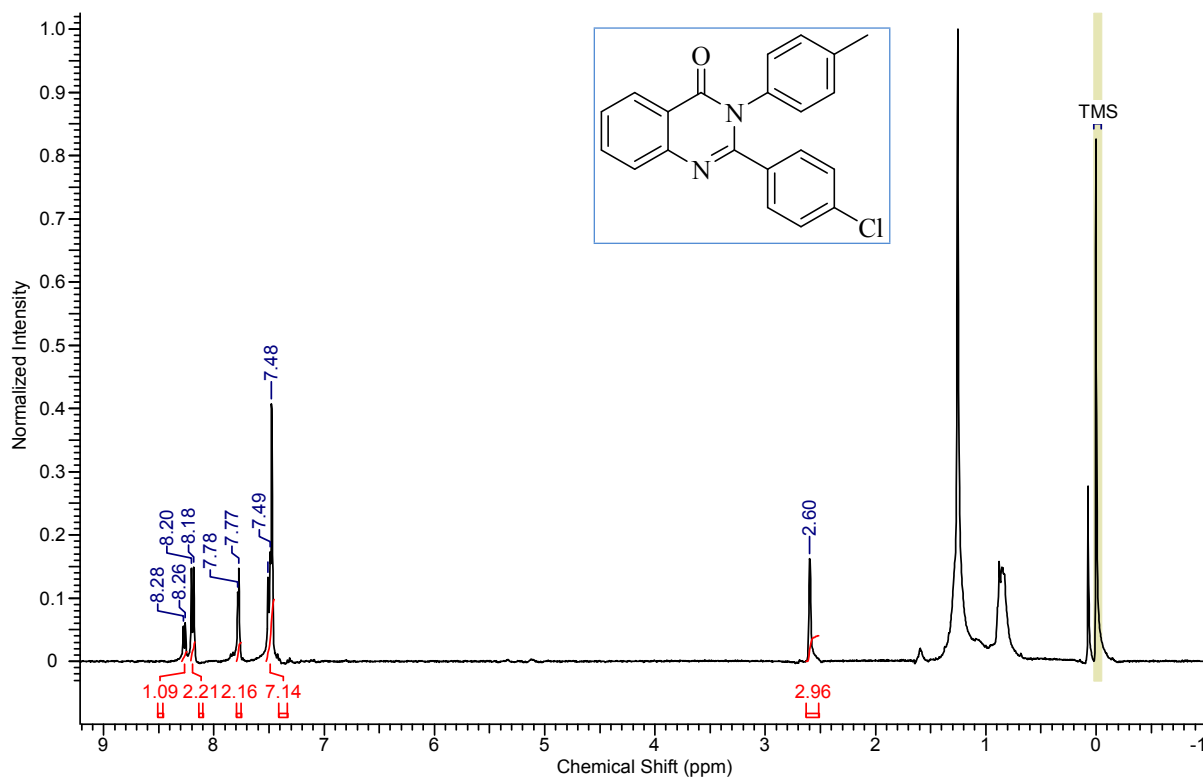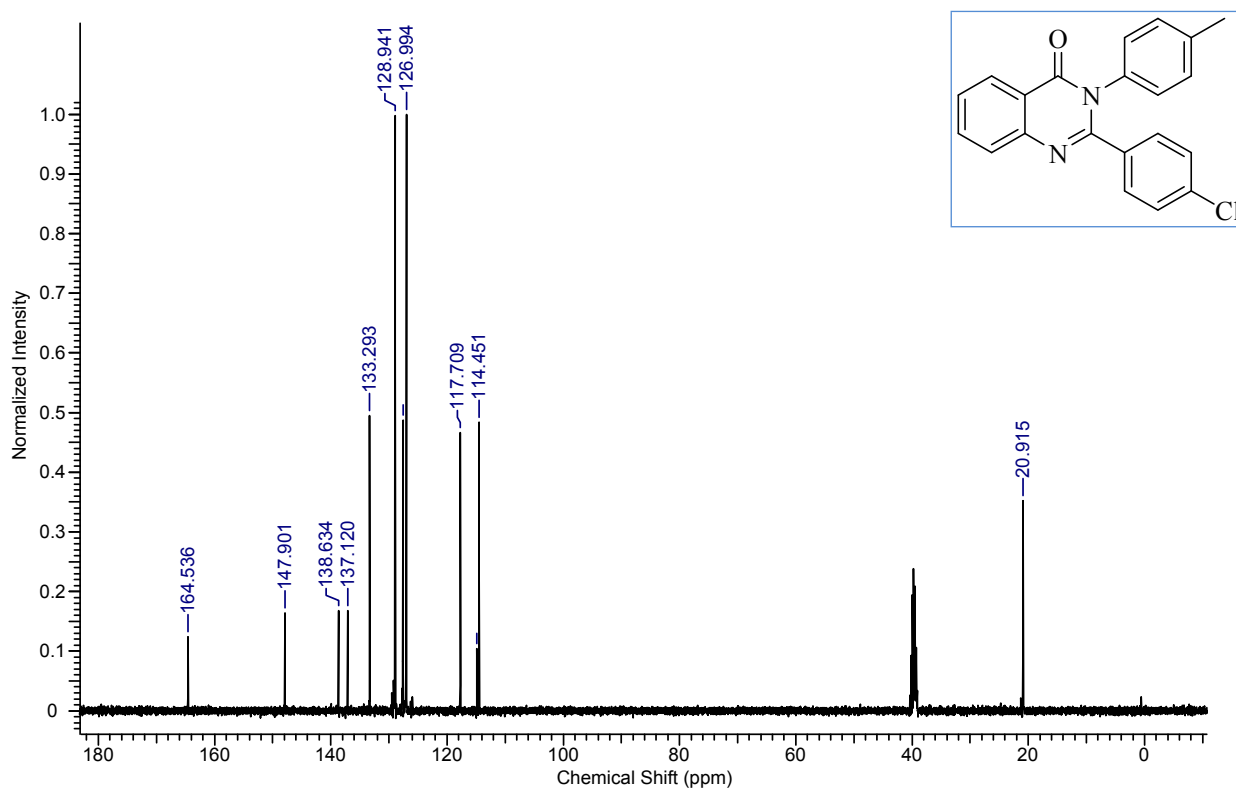

Supplement: c7nj01208j1.pdf [file c7nj01208j1.pdf]
